# Supplementary material for: Genetic Analysis of Population Structure and Reproductive Mode of the Termite Reticulitermes chinensis Snyder
Source: PLoS One. 2013 Jul 22;8(7):e69070. doi: 10.1371/journal.pone.0069070 (PMC3718804; doi:10.1371/journal.pone.0069070)
Supplement: Table S5 — Worker genotypes at the eight microsatellite loci from Huanggang, Changsha and Chongqing Cities. Genotypes marked ‘na’ were unavailable due to failed PCR reactions. (XLS) [file pone.0069070.s008.xls]

## Sheet: SSR data for Huanggang (HG)
Sample	Individual	Rf24-2	Rf21-1	Rf6-1	Rf1-3	RS78	RS68	RS10	RS15
HG1	HG1-1	128/134	223/229	170/179	218/233	188/188	181/181	179/191	290/290
	HG1-2	122/128	226/229	170/179	218/233	180/188	181/181	179/191	275/275
	HG1-3	122/128	226/259	179/179	218/233	180/188	181/181	179/191	290/290
	HG1-4	122/128	226/259	179/179	218/233	188/188	181/181	179/191	275/275
	HG1-5	122/122	226/229	170/170	218/233	180/188	181/181	176/191	290/290
	HG1-6	122/122	223/229	179/179	218/233	188/188	181/181	176/191	275/275
	HG1-7	128/134	226/229	179/179	218/233	180/188	181/181	179/191	290/290
	HG1-8	122/134	226/229	170/179	218/233	180/188	181/181	179/191	275/275
	HG1-9	122/128	223/229	179/179	218/233	180/188	181/181	176/191	290/290
	HG1-10	128/134	226/259	170/179	218/233	180/188	181/181	176/191	290/290
	HG1-11	122/128	223/259	179/179	218/233	180/188	181/181	176/191	290/290
	HG1-12	122/134	223/259	179/179	218/233	180/188	181/181	176/191	275/275
	HG1-13	128/134	223/229	170/179	218/233	188/188	181/181	179/191	275/275
	HG1-14	128/134	226/229	170/179	218/233	180/188	181/181	179/191	275/275
	HG1-15	122/128	226/229	179/179	218/233	188/188	181/181	179/191	275/275
	HG1-16	122/122	226/259	170/179	218/233	180/188	181/181	176/191	275/275
	HG1-17	122/128	226/229	170/179	218/233	188/188	181/181	176/191	275/275
	HG1-18	122/134	223/229	179/179	218/233	188/188	181/181	176/191	290/290
	HG1-19	122/134	223/259	179/179	218/233	180/188	181/181	176/191	275/275
	HG1-20	128/134	226/229	170/179	218/233	180/188	181/181	176/191	275/275
	HG1-21	122/134	226/259	170/179	218/233	180/188	181/181	176/191	275/275
	HG1-22	122/128	223/259	179/179	218/233	180/188	181/181	176/191	275/275
	HG1-23	122/128	226/229	179/179	218/233	188/188	181/181	176/191	275/275
	HG1-24	122/128	226/259	179/179	218/233	180/188	181/181	176/191	275/275
	HG1-25	122/134	223/229	170/179	218/233	188/188	181/181	176/191	290/290
HG2	HG2-1	119/134	220/220	173/182	218/230	192/192	173/189	194/197	278/284
	HG2-2	119/134	220/220	173/182	218/233	192/192	173/173	194/197	275/278
	HG2-3	119/134	220/220	176/182	230/233	188/192	173/189	194/197	278/284
	HG2-4	128/164	220/220	176/182	218/218	192/192	173/189	194/197	275/284
	HG2-5	119/164	220/220	176/182	230/233	188/192	181/189	182/197	275/278
	HG2-6	128/134	250/250	173/182	218/233	188/192	173/173	182/200	275/275
	HG2-7	128/134	250/250	173/182	218/233	188/192	181/189	182/200	275/284
	HG2-8	128/134	250/250	176/182	230/233	192/192	173/189	194/200	275/284
	HG2-9	128/164	250/250	176/182	218/230	188/192	173/181	182/197	278/284
	HG2-10	119/164	250/250	173/182	218/230	188/192	173/181	182/197	275/278
	HG2-11	119/164	250/250	173/182	218/230	192/192	173/173	194/197	278/284
	HG2-12	128/164	220/220	173/182	218/218	192/192	173/173	194/200	275/284
	HG2-13	128/164	250/250	176/182	218/233	188/192	173/189	182/200	275/278
	HG2-14	128/134	220/220	176/182	218/233	188/192	173/173	182/200	275/284
	HG2-15	119/134	220/220	173/182	218/233	188/192	173/173	182/197	278/284
	HG2-16	128/134	250/250	176/182	218/230	192/192	173/173	194/200	275/278
	HG2-17	128/134	250/250	173/182	218/230	188/192	173/181	182/197	275/278
	HG2-18	119/134	250/250	176/182	218/233	188/192	181/189	194/197	275/278
	HG2-19	119/164	220/220	176/182	218/230	188/192	181/189	194/197	275/278
	HG2-20	119/164	220/220	173/182	230/233	192/192	173/189	194/200	275/284
	HG2-21	128/164	250/250	173/182	218/218	188/192	173/173	194/197	278/284
	HG2-22	119/134	250/250	173/182	218/218	188/192	173/189	182/200	275/275
	HG2-23	119/134	220/220	173/182	230/233	192/192	181/189	194/200	275/284
	HG2-24	119/134	250/250	176/182	218/233	192/192	173/189	182/200	275/284
	HG2-25	119/164	220/220	176/182	230/233	192/192	173/181	194/197	275/278
HG3	HG3-1	110/128	223/223	176/185	na	180/192	165/185	na	326/326
	HG3-2	110/164	229/229	176/179	218/233	180/188	165/181	176/185	305/326
	HG3-3	110/128	223/223	179/185	230/233	180/188	165/185	185/200	326/326
	HG3-4	164/167	229/229	176/179	230/233	180/192	165/185	185/200	326/326
	HG3-5	164/167	223/223	176/176	230/233	180/188	165/185	176/179	284/305
	HG3-6	164/167	229/229	176/176	230/233	180/192	165/185	185/200	326/326
	HG3-7	110/128	229/229	176/185	218/233	180/188	165/181	176/185	305/326
	HG3-8	164/167	229/229	179/185	230/233	180/188	165/181	176/185	305/326
	HG3-9	164/167	223/223	176/185	230/233	180/192	165/181	179/200	284/284
	HG3-10	164/167	229/229	176/179	218/233	180/188	165/181	179/200	284/284
	HG3-11	128/167	229/229	176/179	218/233	180/188	165/181	176/179	284/305
	HG3-12	164/167	223/223	176/179	218/233	180/188	165/181	185/200	326/326
	HG3-13	128/167	223/223	176/185	218/233	180/192	165/181	176/185	305/326
	HG3-14	110/128	223/223	179/185	230/233	180/188	165/185	185/200	326/326
	HG3-15	110/128	229/229	176/185	218/233	180/192	165/185	176/185	305/326
	HG3-16	128/167	223/223	179/185	230/233	180/188	165/185	176/185	305/326
	HG3-17	128/167	223/223	176/185	230/233	180/192	165/185	179/200	326/326
	HG3-18	164/167	229/229	176/176	230/233	180/192	165/181	176/179	284/305
	HG3-19	110/128	223/223	176/185	230/233	180/192	165/185	176/179	305/326
	HG3-20	110/128	223/223	176/176	218/233	180/188	165/185	na	284/305
	HG3-21	110/128	223/223	176/179	218/233	180/192	165/185	179/200	284/284
	HG3-22	110/128	229/229	176/176	218/233	180/192	165/181	185/200	326/326
	HG3-23	128/167	229/229	176/176	230/233	180/188	165/185	185/200	326/326
	HG3-24	128/167	223/223	176/176	230/233	180/192	165/181	185/200	326/326
	HG3-25	110/164	229/229	176/176	230/233	180/188	165/181	176/179	284/305
HG4	HG4-1	125/164	229/229	176/200	233/233	192/196	165/189	185/185	275/290
	HG4-2	137/164	229/229	179/200	233/233	192/196	181/189	185/200	278/290
	HG4-3	125/164	229/229	179/200	233/233	192/196	181/181	185/200	278/290
	HG4-4	137/164	256/256	176/176	230/233	192/196	181/181	185/185	278/290
	HG4-5	137/164	256/256	176/179	230/233	192/196	165/181	185/185	278/290
	HG4-6	125/164	229/229	176/179	230/233	192/196	181/181	176/200	278/290
	HG4-7	125/164	256/256	176/200	230/233	192/196	181/189	176/185	278/290
	HG4-8	125/164	256/256	179/200	230/233	192/196	181/189	185/185	275/290
	HG4-9	137/164	256/256	176/176	233/233	180/196	181/181	176/200	275/290
	HG4-10	164/164	229/229	176/200	233/233	192/196	181/181	185/185	275/290
	HG4-11	125/164	229/229	176/200	230/233	180/196	165/189	176/200	275/290
	HG4-12	164/164	256/256	176/176	233/233	180/196	181/189	176/200	275/290
	HG4-13	125/164	256/256	176/200	230/233	180/196	181/189	185/200	278/290
	HG4-14	137/164	256/256	176/179	233/233	192/196	181/181	185/185	275/290
	HG4-15	137/164	256/256	179/200	233/233	180/196	181/181	176/185	275/290
	HG4-16	137/164	229/229	176/179	233/233	180/196	181/189	185/200	278/290
	HG4-17	125/164	256/256	176/179	230/233	180/196	181/181	176/200	278/290
	HG4-18	164/164	229/229	179/200	233/233	192/196	181/189	176/185	275/290
	HG4-19	137/164	256/256	176/176	233/233	180/196	181/189	185/185	275/290
	HG4-20	164/164	229/229	179/200	230/233	192/196	165/189	185/185	275/290
	HG4-21	137/164	229/229	179/200	230/233	192/196	165/181	185/185	278/290
	HG4-22	125/164	256/256	176/176	230/233	192/196	181/181	na	275/290
	HG4-23	137/164	256/256	176/200	230/233	192/196	165/181	na	278/290
	HG4-24	125/137	256/256	176/179	233/233	192/196	165/189	185/185	275/290
	HG4-25	125/137	256/256	179/200	233/233	180/196	181/181	185/185	275/290
HG5	HG5-1	125/137	259/259	185/194	218/218	188/196	181/185	182/200	275/275
	HG5-2	125/137	259/259	185/194	218/218	192/196	181/181	167/200	278/278
	HG5-3	125/137	259/259	185/194	218/218	192/196	181/181	167/200	275/275
	HG5-4	125/137	259/259	185/194	218/218	188/196	181/181	200/206	275/275
	HG5-5	125/137	262/268	179/194	218/233	192/196	181/185	182/206	275/278
	HG5-6	125/137	259/259	185/194	218/218	192/196	181/181	200/206	275/275
	HG5-7	122/125	262/268	185/194	218/233	188/196	181/185	182/182	275/278
	HG5-8	122/125	259/259	179/194	218/233	188/196	181/185	200/206	275/275
	HG5-9	122/125	268/277	185/194	218/233	192/192	181/181	200/206	275/275
	HG5-10	125/137	259/259	185/194	218/218	188/196	181/185	200/206	275/275
	HG5-11	125/137	259/259	179/194	218/233	192/196	181/185	200/206	275/275
	HG5-12	122/125	259/259	185/194	218/233	192/196	181/185	167/182	278/278
	HG5-13	125/137	259/259	179/194	218/218	188/196	181/185	167/182	275/278
	HG5-14	122/125	259/259	185/194	218/233	188/196	181/185	182/182	278/278
	HG5-15	122/125	268/277	179/194	218/233	192/196	181/185	167/200	278/278
	HG5-16	125/137	268/277	179/194	218/233	192/196	181/185	167/167	275/275
	HG5-17	125/137	259/259	185/194	218/218	192/196	181/185	167/167	278/278
	HG5-18	125/137	262/268	185/194	218/233	192/196	181/181	167/167	278/278
	HG5-19	122/122	268/277	179/194	218/233	188/196	181/185	167/182	278/278
	HG5-20	122/122	259/259	185/194	218/218	188/196	181/185	167/200	278/278
	HG5-21	122/137	262/268	185/194	218/233	188/196	181/185	167/182	275/278
	HG5-22	122/122	262/268	185/194	218/218	188/196	181/181	200/206	278/278
	HG5-23	122/137	259/259	185/194	218/218	188/196	181/181	200/206	275/275
	HG5-24	122/137	268/277	185/194	218/218	192/196	181/181	167/182	278/278
	HG5-25	122/122	262/268	179/194	218/218	192/196	181/185	182/182	275/278
HG6	HG6-1	122/128	235/235	176/176	233/233	192/192	181/185	167/207	332/347
	HG6-2	122/128	211/211	176/191	233/236	188/188	165/173	167/182	278/347
	HG6-3	122/128	211/211	188/191	218/233	188/192	165/181	176/182	278/347
	HG6-4	122/134	211/211	188/191	233/236	188/192	165/173	176/182	278/278
	HG6-5	122/134	235/235	176/188	218/236	188/192	165/181	167/207	332/347
	HG6-6	122/134	235/235	176/191	218/233	188/192	181/185	167/207	332/347
	HG6-7	122/134	211/211	176/191	218/233	188/192	165/181	167/207	332/347
	HG6-8	122/134	211/211	176/176	218/233	188/188	165/173	176/182	278/278
	HG6-9	122/134	211/211	176/188	233/233	192/192	181/185	167/207	278/332
	HG6-10	122/134	235/235	176/188	218/236	188/192	165/181	176/182	278/278
	HG6-11	122/128	211/211	188/191	218/236	188/188	181/185	176/182	278/278
	HG6-12	122/134	211/211	176/188	218/236	188/192	181/185	167/207	332/347
	HG6-13	122/128	211/211	176/188	233/233	192/192	181/185	167/207	332/347
	HG6-14	122/128	235/235	176/188	218/236	188/192	165/181	167/207	332/347
	HG6-15	122/134	235/235	176/188	218/233	188/192	173/185	176/182	278/278
	HG6-16	122/128	211/211	176/188	233/233	188/192	181/185	167/207	332/347
	HG6-17	122/128	235/235	176/188	218/236	188/188	181/185	176/182	278/278
	HG6-18	122/134	211/211	188/191	233/236	188/192	173/185	167/207	278/332
	HG6-19	122/128	235/235	188/191	233/236	188/192	173/185	176/182	278/278
	HG6-20	122/128	211/211	188/191	218/233	192/192	181/185	167/207	332/347
	HG6-21	122/134	211/211	176/191	233/233	188/192	181/185	167/182	278/347
	HG6-22	122/128	211/211	176/176	218/236	188/188	165/181	167/207	278/332
	HG6-23	122/128	235/235	176/191	218/236	188/192	181/185	176/182	278/347
	HG6-24	122/134	na	176/176	218/233	188/192	165/181	176/207	278/332
	HG6-25	122/134	211/211	176/191	218/236	188/188	165/173	176/182	278/278
HG7	HG7-1	122/167	271/271	176/194	224/230	180/188	181/185	176/179	275/290
	HG7-2	131/167	271/271	176/194	224/230	180/188	181/185	176/179	290/350
	HG7-3	131/170	226/226	179/194	224/230	180/180	181/181	176/179	275/290
	HG7-4	122/167	226/226	176/176	218/224	180/180	181/181	176/201	275/278
	HG7-5	131/170	271/271	179/194	224/230	180/188	181/185	176/179	275/290
	HG7-6	122/170	226/226	176/179	224/230	180/180	181/181	176/201	275/290
	HG7-7	122/170	271/271	176/179	218/218	180/188	181/185	176/201	278/350
	HG7-8	122/167	226/226	176/176	218/218	180/180	181/185	176/179	275/278
	HG7-9	131/170	226/226	176/176	218/218	180/180	185/185	176/201	275/278
	HG7-10	122/170	226/226	179/194	218/218	180/180	181/181	176/201	275/278
	HG7-11	131/170	226/226	179/194	224/230	180/180	173/181	176/201	278/350
	HG7-12	122/167	271/271	176/176	218/230	180/180	185/185	176/201	275/278
	HG7-13	122/170	271/271	176/176	218/224	180/188	181/185	176/201	275/290
	HG7-14	122/170	271/271	179/194	224/230	180/188	181/185	176/179	275/290
	HG7-15	131/170	226/226	176/179	218/230	180/180	181/185	176/179	275/278
	HG7-16	122/167	226/226	176/194	218/218	180/188	181/185	176/201	278/350
	HG7-17	131/170	226/226	176/179	218/224	180/188	185/185	176/179	275/290
	HG7-18	131/170	226/226	176/194	224/230	180/180	181/181	176/201	290/350
	HG7-19	122/167	226/226	179/194	224/230	180/188	181/181	176/201	275/290
	HG7-20	131/167	226/226	176/179	218/218	180/180	181/185	176/201	275/290
	HG7-21	122/167	226/226	176/179	224/230	180/188	181/185	176/201	278/350
	HG7-22	122/167	271/271	176/176	218/230	180/180	185/185	176/201	290/350
	HG7-23	131/167	271/271	176/176	224/230	180/188	185/185	176/179	275/290
	HG7-24	131/170	226/226	176/194	218/224	180/180	181/181	176/179	278/350
	HG7-25	122/170	226/226	179/194	218/218	180/180	181/181	176/179	275/278
HG8	HG8-1	128/170	226/226	179/197	218/233	188/192	181/189	201/204	290/290
	HG8-2	122/128	226/226	176/179	218/233	188/192	181/189	182/201	275/290
	HG8-3	122/128	226/226	176/179	218/233	180/180	181/185	176/182	275/275
	HG8-4	128/170	226/226	176/197	218/233	188/192	181/185	176/182	275/290
	HG8-5	128/170	226/226	176/197	212/218	180/192	181/189	182/201	275/275
	HG8-6	128/170	226/226	176/176	212/218	180/188	181/189	201/204	275/275
	HG8-7	122/128	226/226	176/179	212/218	188/192	181/189	201/204	275/275
	HG8-8	122/128	226/226	176/197	212/218	180/192	181/189	201/204	290/290
	HG8-9	122/128	226/226	176/179	212/218	180/180	181/189	182/201	275/290
	HG8-10	122/128	226/226	176/179	212/218	180/192	181/185	201/204	290/290
	HG8-11	128/170	226/226	179/197	218/233	180/192	181/185	176/204	275/275
	HG8-12	128/170	226/226	176/197	218/233	180/180	181/189	201/204	275/275
	HG8-13	128/170	226/226	176/176	218/233	180/180	181/185	176/182	275/290
	HG8-14	122/128	226/226	176/179	212/218	180/180	181/185	176/204	275/275
	HG8-15	128/170	226/226	176/179	218/233	180/180	181/189	201/204	275/275
	HG8-16	128/170	226/226	179/197	212/218	180/180	181/189	176/182	275/290
	HG8-17	122/128	226/226	176/179	218/233	180/180	181/185	176/204	275/275
	HG8-18	128/170	226/226	176/197	218/233	188/192	181/189	176/204	275/275
	HG8-19	128/170	226/226	176/179	212/218	180/192	181/189	176/182	275/290
	HG8-20	122/128	226/226	176/176	218/233	188/192	181/189	176/204	290/290
	HG8-21	128/170	226/226	176/176	212/218	188/192	181/185	176/182	275/275
	HG8-22	128/170	226/226	179/197	218/233	180/188	181/189	182/201	275/275
	HG8-23	128/170	226/226	176/176	212/218	180/192	181/185	176/204	290/290
	HG8-24	128/170	226/226	176/197	212/218	180/188	181/185	201/204	290/290
	HG8-25	128/170	226/226	176/176	212/218	188/192	181/185	182/201	275/275
HG9	HG9-1	128/128	229/229	176/176	230/233	180/188	181/185	201/201	278/290
	HG9-2	128/128	229/229	176/176	230/233	180/188	181/185	176/207	275/290
	HG9-3	128/164	223/229	176/197	233/233	188/196	181/185	176/207	275/290
	HG9-4	128/128	223/229	176/197	230/233	188/196	181/185	176/201	278/296
	HG9-5	128/128	223/229	176/197	230/233	188/196	185/185	176/201	278/290
	HG9-6	128/164	223/229	179/197	230/233	188/196	181/185	176/207	275/296
	HG9-7	128/128	223/229	176/179	230/230	188/196	185/185	176/207	275/290
	HG9-8	128/128	223/229	176/179	230/233	180/188	181/185	176/204	278/290
	HG9-9	128/128	223/229	176/197	230/233	188/196	185/185	176/204	278/296
	HG9-10	128/164	229/229	176/179	233/233	188/196	181/185	176/204	278/296
	HG9-11	128/164	223/229	179/197	230/233	188/196	181/185	201/201	278/296
	HG9-12	128/164	229/229	176/176	233/233	188/196	185/185	201/201	278/296
	HG9-13	128/164	229/229	176/176	230/230	180/188	181/185	204/207	275/290
	HG9-14	128/128	229/229	176/176	230/233	180/188	181/185	176/201	278/296
	HG9-15	128/164	229/229	176/176	230/233	188/196	181/185	176/201	275/290
	HG9-16	128/128	229/229	176/179	230/233	188/196	181/185	176/201	278/296
	HG9-17	128/164	223/229	176/179	230/230	180/188	185/185	201/201	278/296
	HG9-18	128/128	229/229	179/197	230/233	188/196	181/185	176/207	278/296
	HG9-19	128/128	223/229	176/176	230/233	180/188	185/185	176/201	278/290
	HG9-20	128/164	229/229	176/179	233/233	180/188	181/185	204/207	275/290
	HG9-21	128/128	223/229	176/197	233/233	180/188	181/185	176/201	278/290
	HG9-22	128/128	223/229	176/176	230/233	188/196	181/185	176/201	275/290
	HG9-23	128/128	229/229	179/197	230/230	188/196	185/185	176/201	278/290
	HG9-24	128/164	229/229	176/176	230/230	188/196	181/185	176/207	275/290
	HG9-25	128/128	229/229	176/197	230/230	180/188	181/185	176/201	278/290
HG10	HG10-1	128/164	223/229	179/197	230/230	188/196	181/185	204/207	275/290
	HG10-2	128/128	229/229	176/179	230/230	180/188	185/185	204/207	275/290
	HG10-3	128/164	223/229	176/179	230/233	180/188	185/185	176/201	278/296
	HG10-4	128/164	223/229	176/176	233/233	180/188	185/185	204/207	275/296
	HG10-5	128/164	229/229	176/197	233/233	180/188	181/185	201/201	278/296
	HG10-6	128/128	223/229	176/176	230/233	188/196	185/185	201/201	278/290
	HG10-7	128/164	223/229	179/197	230/233	188/196	181/185	176/201	278/290
	HG10-8	128/164	229/229	176/179	230/230	188/196	181/185	176/176	278/290
	HG10-9	128/164	223/229	179/197	233/233	180/188	185/185	176/201	278/296
	HG10-10	128/128	223/229	176/197	230/230	188/196	185/185	201/207	275/290
	HG10-11	128/128	223/229	176/197	230/233	188/196	181/185	176/201	278/290
	HG10-12	125/128	229/229	176/197	230/233	180/188	181/185	201/207	275/290
	HG10-13	128/164	223/229	179/197	230/230	188/196	185/185	201/201	278/290
	HG10-14	128/164	223/229	176/197	230/233	188/196	185/185	201/207	275/290
	HG10-15	125/128	223/229	176/176	233/233	180/188	185/185	201/207	275/290
	HG10-16	125/128	229/229	176/179	230/233	180/188	185/185	201/201	278/296
	HG10-17	125/128	223/229	176/179	233/233	188/196	185/185	201/207	275/296
	HG10-18	125/128	229/229	176/176	230/230	180/188	181/185	201/201	275/290
	HG10-19	128/164	229/229	176/197	230/233	188/196	181/185	176/201	278/296
	HG10-20	128/164	223/229	176/179	230/233	188/196	185/185	201/207	275/290
	HG10-21	128/164	223/229	176/197	233/233	188/196	181/185	201/207	275/296
	HG10-22	128/164	223/229	179/197	230/233	180/188	185/185	176/207	275/290
	HG10-23	125/128	223/229	176/179	233/233	188/196	185/185	176/207	275/290
	HG10-24	128/164	223/229	176/179	233/233	180/188	185/185	201/207	275/296
	HG10-25	125/128	229/229	176/176	230/233	188/196	181/185	176/207	275/290
HG11	HG11-1	128/131	229/262	182/185	233/233	178/180	177/189	167/185	290/290
	HG11-2	128/131	229/232	185/197	218/233	178/180	165/185	167/167	290/290
	HG11-3	128/131	262/265	179/182	218/233	180/180	177/185	167/185	290/290
	HG11-4	128/131	262/265	179/182	218/233	180/180	177/189	167/167	290/290
	HG11-5	128/131	232/265	185/197	233/233	180/180	165/185	167/167	290/290
	HG11-6	128/131	229/262	179/197	218/233	180/180	165/189	167/167	290/290
	HG11-7	128/131	232/265	182/185	218/233	178/180	177/185	167/185	290/290
	HG11-8	128/131	229/262	179/182	212/233	180/180	177/189	167/167	290/290
	HG11-9	128/131	229/262	182/185	233/233	180/180	177/189	167/167	290/290
	HG11-10	128/131	262/265	179/197	212/218	178/180	177/185	167/185	290/290
	HG11-11	128/131	232/265	179/182	212/218	178/180	165/185	167/185	290/290
	HG11-12	128/131	232/265	185/197	233/233	178/180	165/185	167/167	290/290
	HG11-13	128/131	232/265	179/197	218/233	180/180	177/189	167/167	290/290
	HG11-14	128/131	262/265	179/182	218/233	178/180	177/189	167/167	290/290
	HG11-15	128/131	262/265	179/182	218/233	178/180	165/185	167/167	290/290
	HG11-16	128/131	232/265	179/182	218/233	180/180	165/185	167/167	290/290
	HG11-17	128/131	232/265	182/185	212/233	180/180	177/189	167/167	290/290
	HG11-18	128/131	262/265	185/197	233/233	180/180	177/185	167/185	290/290
	HG11-19	128/131	229/232	179/197	212/233	180/180	177/185	167/167	290/290
	HG11-20	128/131	232/265	182/185	218/233	178/180	177/189	167/185	290/290
	HG11-21	128/131	229/262	185/197	218/233	180/180	177/189	167/167	290/290
	HG11-22	128/131	229/232	179/182	212/218	178/180	165/189	167/185	290/290
	HG11-23	128/131	232/265	179/182	233/233	180/180	177/185	167/167	290/290
	HG11-24	128/131	229/232	185/197	212/218	178/180	165/189	167/167	290/290
	HG11-25	128/131	229/232	185/197	233/233	178/180	165/189	167/167	290/290
HG12	HG12-1	128/164	229/256	176/179	218/233	180/196	189/189	176/176	344/347
	HG12-2	122/131	241/256	179/179	218/218	180/188	189/189	176/176	344/347
	HG12-3	131/164	229/256	179/179	218/218	180/188	189/189	176/176	344/347
	HG12-4	131/164	229/229	176/179	218/218	180/196	189/189	176/176	344/347
	HG12-5	122/131	229/256	179/179	218/233	180/196	181/189	176/185	344/347
	HG12-6	122/128	241/256	179/179	218/233	188/196	181/189	176/179	305/344
	HG12-7	122/131	229/241	176/179	218/233	180/196	181/189	179/185	305/362
	HG12-8	128/164	229/256	179/179	218/218	180/180	189/189	176/179	305/344
	HG12-9	128/164	229/229	176/179	218/218	180/180	181/189	176/176	344/347
	HG12-10	128/164	241/256	176/179	218/233	180/180	181/189	176/185	347/362
	HG12-11	122/128	229/229	179/179	218/218	180/196	189/189	176/176	347/362
	HG12-12	122/131	241/256	176/179	218/233	188/196	181/189	176/179	305/344
	HG12-13	128/164	229/256	179/179	218/218	188/196	189/189	176/179	305/344
	HG12-14	128/164	229/241	176/179	218/218	180/196	189/189	179/185	305/362
	HG12-15	128/164	241/256	176/179	218/233	180/196	181/189	176/179	305/344
	HG12-16	122/128	229/229	179/179	218/218	180/188	189/189	179/185	305/344
	HG12-17	128/164	229/256	179/179	218/218	188/196	181/189	179/185	305/362
	HG12-18	122/128	229/229	176/179	218/218	188/196	189/189	179/185	305/362
	HG12-19	122/128	241/256	179/179	218/233	188/196	189/189	176/176	344/347
	HG12-20	122/128	229/241	179/179	218/233	180/188	189/189	179/185	305/362
	HG12-21	128/164	229/229	176/179	218/233	180/196	189/189	176/185	344/347
	HG12-22	122/131	241/256	176/179	218/233	188/196	189/189	176/179	305/344
	HG12-23	122/128	229/229	179/179	218/233	180/180	189/189	176/176	344/347
	HG12-24	122/131	229/229	176/179	218/218	180/196	189/189	176/179	305/344
	HG12-25	128/164	241/256	179/179	218/233	180/196	189/189	176/185	344/347
HG13	HG13-1	110/128	256/262	179/194	218/233	188/192	177/185	176/200	290/290
	HG13-2	128/128	256/256	179/194	212/218	188/188	165/177	200/200	290/290
	HG13-3	110/110	223/256	179/194	218/233	188/192	177/177	176/200	290/290
	HG13-4	110/128	256/256	194/194	218/218	188/188	177/185	170/176	290/290
	HG13-5	128/128	256/262	194/194	212/218	180/188	165/177	200/200	290/290
	HG13-6	110/128	223/256	179/194	218/218	180/188	165/165	200/200	278/290
	HG13-7	110/110	223/256	194/194	212/218	188/188	165/177	170/200	290/290
	HG13-8	110/128	256/262	179/194	218/233	188/192	177/177	176/200	290/290
	HG13-9	110/110	256/262	179/194	212/218	188/192	165/177	170/176	290/290
	HG13-10	110/110	223/262	179/194	212/218	188/192	177/177	176/200	290/290
	HG13-11	110/128	256/256	194/194	218/218	180/188	177/177	170/176	290/290
	HG13-12	128/128	256/262	179/194	218/233	188/188	177/177	200/200	290/290
	HG13-13	110/110	223/256	194/194	218/218	188/188	177/185	170/176	278/290
	HG13-14	128/128	223/262	179/194	218/233	188/188	177/177	170/200	290/290
	HG13-15	110/110	256/262	194/194	212/218	188/188	177/177	170/200	290/290
	HG13-16	110/110	256/256	179/194	212/218	188/188	165/177	170/170	278/290
	HG13-17	110/110	223/256	179/194	212/218	188/192	177/185	176/200	263/290
	HG13-18	110/128	223/262	179/194	218/233	188/188	165/185	200/200	278/290
	HG13-19	110/128	256/256	179/194	212/218	188/188	177/177	170/200	290/290
	HG13-20	110/110	223/256	179/194	212/218	188/192	177/177	176/200	290/290
	HG13-21	128/128	223/262	179/194	212/218	180/188	165/185	170/200	278/290
	HG13-22	110/110	223/262	194/194	212/218	180/188	177/177	170/176	290/290
	HG13-23	110/110	223/262	179/194	218/233	188/192	177/177	170/176	290/290
	HG13-24	110/110	256/256	179/194	218/233	188/188	165/177	170/200	290/290
	HG13-25	110/110	256/256	194/194	218/233	188/188	177/177	170/200	290/290
HG14	HG14-1	122/164	229/229	179/179	218/233	180/196	177/177	176/179	278/332
	HG14-2	128/164	223/223	179/179	233/233	180/196	165/185	176/179	278/332
	HG14-3	122/164	223/223	179/179	218/233	180/180	177/177	176/179	278/278
	HG14-4	na	220/223	179/179	233/233	180/180	165/185	176/179	278/278
	HG14-5	128/164	229/229	179/179	233/233	180/180	165/177	176/179	278/332
	HG14-6	128/164	220/229	179/179	233/233	180/196	165/177	176/179	278/278
	HG14-7	122/164	220/229	179/179	233/233	180/196	165/177	176/179	278/332
	HG14-8	122/164	220/223	179/179	218/233	180/196	177/185	176/179	278/278
	HG14-9	128/164	229/229	179/179	218/233	180/196	165/177	176/179	278/332
	HG14-10	122/164	229/229	179/179	233/233	180/180	177/185	176/179	278/332
	HG14-11	128/164	220/223	179/179	233/233	180/180	165/177	176/179	278/278
	HG14-12	na	229/229	179/179	218/233	180/180	177/177	176/179	278/278
	HG14-13	128/164	229/229	179/179	218/233	180/196	165/185	176/179	278/332
	HG14-14	128/164	220/223	179/179	218/233	180/180	177/177	176/179	278/278
	HG14-15	128/164	220/229	179/179	233/233	180/180	177/185	176/179	278/278
	HG14-16	128/164	220/223	179/179	218/233	180/196	165/185	176/179	278/332
	HG14-17	122/164	220/223	179/179	218/233	180/196	165/177	176/179	278/332
	HG14-18	122/164	220/229	179/179	233/233	180/196	177/177	176/179	278/332
	HG14-19	122/164	220/229	179/179	233/233	180/180	165/185	176/179	278/332
	HG14-20	122/164	220/223	179/179	233/233	180/196	165/177	176/179	278/278
	HG14-21	122/164	220/229	179/179	233/233	180/196	177/177	176/179	278/278
	HG14-22	122/164	229/229	179/179	233/233	180/180	177/185	176/179	278/332
	HG14-23	122/164	229/229	179/179	233/233	180/180	177/185	176/179	278/278
	HG14-24	122/164	220/223	179/179	233/233	180/180	177/185	176/179	278/332
	HG14-25	122/164	229/229	179/179	233/233	180/180	165/177	176/179	278/278
HG15	HG15-1	131/167	256/256	176/179	218/233	178/178	185/193	167/185	275/344
	HG15-2	128/131	232/256	179/185	218/218	180/192	181/181	167/185	344/344
	HG15-3	128/164	232/256	176/182	218/218	178/178	181/181	167/185	275/305
	HG15-4	128/164	256/256	179/185	218/218	178/178	181/185	167/185	275/305
	HG15-5	131/167	256/256	182/185	218/233	178/180	181/193	167/185	275/305
	HG15-6	128/131	232/256	176/179	218/218	178/180	185/193	167/185	275/305
	HG15-7	128/131	232/256	176/179	218/233	178/192	181/181	167/185	275/344
	HG15-8	128/131	256/256	176/179	218/218	180/192	181/193	167/185	305/305
	HG15-9	128/131	232/256	179/185	218/218	178/178	185/193	167/185	275/305
	HG15-10	164/167	232/256	182/185	218/218	178/178	185/193	167/185	305/305
	HG15-11	128/131	na	176/179	218/233	na	181/181	na	305/347
	HG15-12	128/164	232/256	182/185	218/218	178/180	181/193	167/185	305/305
	HG15-13	128/131	232/256	176/182	218/233	178/180	181/185	167/185	344/344
	HG15-14	131/167	256/256	182/185	218/233	178/178	185/193	167/185	275/305
	HG15-15	131/167	232/256	182/185	218/233	180/192	181/193	167/185	275/305
	HG15-16	128/164	232/256	176/182	218/233	178/178	181/181	167/185	275/305
	HG15-17	131/167	232/256	176/182	218/233	178/178	185/193	167/185	275/344
	HG15-18	128/164	256/256	176/182	218/233	178/192	185/193	167/185	344/344
	HG15-19	128/164	256/256	176/179	218/233	178/192	181/185	167/185	275/344
	HG15-20	128/131	256/256	176/179	218/233	178/180	181/181	167/185	275/344
	HG15-21	128/164	256/256	176/179	218/233	178/192	185/193	167/185	344/344
	HG15-22	128/164	256/256	176/179	218/218	180/192	181/193	167/185	275/305
	HG15-23	128/131	232/256	182/185	218/233	180/192	181/185	167/185	275/344
	HG15-24	164/167	232/256	179/185	218/218	178/180	181/185	167/185	275/305
	HG15-25	128/164	256/256	182/185	218/233	178/180	185/193	167/185	305/305
HG16	HG16-1	161/164	229/229	179/182	233/233	180/192	185/185	176/194	278/344
	HG16-2	128/164	229/229	179/182	233/233	180/180	185/185	176/194	278/344
	HG16-3	161/164	229/229	179/188	233/233	180/192	185/185	176/194	278/344
	HG16-4	131/164	229/229	179/188	233/233	180/180	185/185	176/194	278/344
	HG16-5	131/164	229/229	179/188	233/233	180/180	180/185	176/194	278/344
	HG16-6	131/164	229/229	179/182	233/233	180/192	185/185	176/194	278/344
	HG16-7	164/164	229/229	179/182	233/233	180/192	180/185	176/194	278/344
	HG16-8	131/164	229/229	179/188	233/233	180/180	180/185	176/194	278/344
	HG16-9	128/164	229/229	179/182	233/233	180/180	185/185	176/197	284/344
	HG16-10	164/164	229/229	179/188	233/233	180/180	185/185	176/197	284/344
	HG16-11	128/164	229/229	179/188	233/233	180/192	180/185	176/197	284/344
	HG16-12	128/164	229/229	179/182	233/233	180/180	185/185	176/197	284/344
	HG16-13	128/164	229/229	179/188	233/233	180/180	180/185	176/194	278/344
	HG16-14	131/164	229/229	179/188	233/233	180/192	185/185	176/194	278/344
	HG16-15	128/131	229/229	179/182	233/233	180/180	185/185	176/194	278/344
	HG16-16	128/131	229/229	179/182	233/233	180/192	185/185	176/197	284/344
	HG16-17	161/164	229/229	179/188	233/233	180/192	180/185	176/194	278/344
	HG16-18	128/131	229/229	179/188	233/233	180/192	185/185	176/194	278/344
	HG16-19	128/164	229/229	179/188	233/233	180/180	185/185	176/197	284/344
	HG16-20	131/164	229/229	179/182	233/233	180/180	185/185	176/194	278/344
	HG16-21	128/164	229/229	179/182	233/233	180/192	185/185	176/197	284/344
	HG16-22	161/164	229/229	179/182	233/233	180/192	185/185	176/197	284/344
	HG16-23	128/164	229/229	179/188	233/233	180/192	180/185	176/197	284/344
	HG16-24	131/164	229/229	179/182	233/233	180/192	185/185	176/197	284/344
	HG16-25	161/164	229/229	179/182	233/233	180/180	185/185	176/197	284/344
HG17	HG17-1	128/131	271/271	179/188	230/233	180/180	185/185	176/176	332/332
	HG17-2	131/164	265/271	179/188	230/233	180/188	185/185	176/176	332/332
	HG17-3	131/164	265/271	179/182	230/233	180/180	165/165	176/176	332/332
	HG17-4	161/164	271/271	179/182	230/233	180/180	185/185	176/176	332/332
	HG17-5	131/164	223/223	179/200	233/233	180/188	185/185	176/182	332/377
	HG17-6	161/164	271/271	179/188	233/233	180/180	185/185	176/176	284/305
	HG17-7	161/164	223/223	179/182	233/233	188/192	185/185	176/182	305/305
	HG17-8	161/164	223/223	179/182	233/233	180/188	185/185	176/182	377/377
	HG17-9	161/164	271/271	179/188	230/233	180/192	185/185	176/176	305/332
	HG17-10	161/164	223/223	179/182	233/233	180/180	185/185	176/176	332/332
	HG17-11	131/164	271/271	179/188	233/233	180/188	185/185	176/176	377/377
	HG17-12	131/164	271/271	179/188	230/233	180/180	165/165	176/176	332/377
	HG17-13	161/164	265/265	179/182	233/233	188/188	185/185	176/176	332/332
	HG17-14	131/164	265/271	179/188	233/233	180/192	165/165	176/182	377/377
	HG17-15	161/164	265/271	179/179	233/233	180/180	185/185	176/182	332/332
	HG17-16	128/131	271/271	179/200	233/233	180/192	185/185	176/182	305/305
	HG17-17	128/131	265/271	179/200	233/233	188/192	165/185	176/182	377/377
	HG17-18	131/164	271/271	179/179	233/233	188/192	165/165	176/182	377/377
	HG17-19	128/128	265/271	179/188	233/233	180/180	185/185	176/176	332/332
	HG17-20	131/131	271/271	179/188	233/233	180/180	185/185	176/182	305/305
	HG17-21	131/131	271/271	179/188	230/233	180/180	165/185	176/182	377/377
	HG17-22	131/164	271/271	179/200	233/233	180/192	165/185	176/182	377/377
	HG17-23	131/164	265/271	179/179	233/233	188/192	185/185	176/176	377/377
	HG17-24	131/164	223/223	179/188	230/233	180/192	165/165	176/176	305/305
	HG17-25	131/164	271/271	179/179	233/233	180/188	165/185	176/182	377/377
HG18	HG18-1	128/167	256/256	179/179	233/233	180/188	173/181	176/182	278/278
	HG18-2	131/167	256/256	179/191	224/233	188/188	165/173	176/176	338/362
	HG18-3	131/167	256/256	179/179	224/233	180/192	181/185	176/176	338/362
	HG18-4	128/167	256/256	176/191	233/233	188/188	165/173	176/182	338/338
	HG18-5	122/131	256/256	176/191	233/233	188/192	181/185	176/176	278/278
	HG18-6	128/167	256/256	176/179	233/233	188/188	165/173	176/176	278/278
	HG18-7	131/167	256/256	179/179	224/236	188/188	165/173	176/182	338/338
	HG18-8	131/167	256/256	176/179	224/233	188/188	181/185	176/182	278/278
	HG18-9	128/167	211/211	179/179	233/233	188/192	165/185	176/182	278/278
	HG18-10	131/167	211/211	179/191	233/233	188/188	173/181	176/182	278/278
	HG18-11	122/131	256/256	179/191	224/233	188/192	181/185	176/182	278/278
	HG18-12	128/167	256/256	179/191	233/233	180/192	165/185	176/182	338/362
	HG18-13	122/128	256/256	176/179	224/233	188/188	181/185	176/176	278/278
	HG18-14	128/167	256/256	176/179	224/236	180/188	173/181	176/182	278/278
	HG18-15	122/131	256/256	179/179	233/236	188/188	165/185	176/182	278/278
	HG18-16	128/167	256/256	179/179	224/236	180/192	173/181	176/182	278/278
	HG18-17	131/167	256/256	179/179	224/236	188/188	181/185	176/176	338/338
	HG18-18	128/167	211/211	176/179	224/236	188/192	173/181	176/176	338/338
	HG18-19	131/131	211/211	176/179	na	188/188	165/185	176/176	278/278
	HG18-20	131/167	211/211	179/191	233/236	188/192	165/185	176/176	338/338
	HG18-21	131/167	223/256	179/191	233/236	188/192	173/181	176/176	338/362
	HG18-22	128/167	211/211	176/179	233/236	180/188	165/185	176/176	278/278
	HG18-23	131/167	256/256	176/179	224/236	188/192	181/185	176/176	338/362
	HG18-24	128/167	211/211	179/179	224/233	180/188	173/181	176/176	338/362
	HG18-25	122/131	256/256	179/179	224/233	188/188	165/173	176/176	278/278
HG19	HG19-1	116/131	229/229	188/194	218/233	178/192	181/185	176/176	278/290
	HG19-2	131/134	223/223	176/179	218/218	178/192	181/181	176/176	284/290
	HG19-3	116/131	229/229	176/179	218/233	180/192	181/185	176/176	278/290
	HG19-4	116/131	223/223	179/194	218/218	178/180	181/185	176/176	278/284
	HG19-5	128/134	223/223	188/194	218/218	180/180	181/181	176/176	284/284
	HG19-6	128/134	223/223	188/194	218/218	180/180	181/181	176/176	278/284
	HG19-7	116/131	223/223	176/179	218/233	180/192	181/185	176/176	278/284
	HG19-8	131/134	223/223	176/179	218/218	180/192	181/185	176/176	278/290
	HG19-9	128/134	229/229	176/188	218/218	180/180	181/181	176/176	284/290
	HG19-10	128/134	229/229	179/194	218/233	178/180	181/185	176/176	278/290
	HG19-11	116/128	223/229	176/179	218/218	178/192	181/181	176/176	284/290
	HG19-12	128/134	223/229	179/194	218/218	180/180	181/185	176/176	284/290
	HG19-13	116/128	229/229	176/179	218/233	180/192	181/181	176/176	284/284
	HG19-14	116/131	223/223	188/194	218/218	178/192	181/181	176/176	278/284
	HG19-15	116/131	223/223	176/188	218/233	178/180	181/185	176/176	278/284
	HG19-16	116/128	229/229	188/194	218/233	180/192	181/185	176/176	278/290
	HG19-17	128/134	223/229	179/194	218/218	178/180	181/181	176/176	278/290
	HG19-18	128/134	223/223	179/194	218/233	180/192	181/185	176/176	278/290
	HG19-19	128/134	223/229	188/194	218/218	180/180	181/181	176/176	284/284
	HG19-20	116/128	223/229	176/188	218/233	180/192	181/181	176/182	278/290
	HG19-21	116/128	223/223	179/194	218/218	178/180	181/185	176/176	278/290
	HG19-22	116/131	223/223	176/188	218/218	178/180	181/185	176/176	278/290
	HG19-23	128/134	223/229	179/194	218/233	180/192	181/185	176/182	278/284
	HG19-24	116/131	223/223	188/194	218/218	180/180	181/185	176/182	278/284
	HG19-25	131/134	223/229	188/194	218/218	180/192	181/185	176/182	278/290
HG20	HG20-1	128/134	268/277	176/179	218/233	180/180	181/181	176/182	278/284
	HG20-2	116/128	223/229	176/179	218/233	180/192	181/181	176/182	278/290
	HG20-3	116/128	223/229	188/194	218/233	180/180	181/181	176/200	290/290
	HG20-4	116/131	268/277	179/194	218/233	180/192	181/181	176/182	278/290
	HG20-5	116/128	223/229	188/194	218/233	178/192	181/185	176/182	290/290
	HG20-6	116/128	229/229	176/179	218/233	178/192	181/185	176/182	290/290
	HG20-7	131/134	268/277	179/194	218/218	180/180	181/185	176/200	278/290
	HG20-8	128/134	223/223	188/194	218/218	180/192	181/181	176/200	284/284
	HG20-9	116/131	223/223	188/194	218/233	180/180	181/185	176/182	278/290
	HG20-10	131/134	223/229	179/194	218/233	178/180	181/181	176/182	278/290
	HG20-11	128/134	268/277	176/179	218/233	178/180	181/181	176/200	284/284
	HG20-12	131/134	268/277	176/179	218/233	180/192	181/181	176/200	278/284
	HG20-13	116/128	223/229	176/188	218/233	180/180	181/185	176/182	278/284
	HG20-14	128/134	268/277	176/188	218/218	178/180	181/181	176/200	290/290
	HG20-15	131/134	223/229	176/188	218/233	178/180	181/181	176/200	290/290
	HG20-16	128/134	268/277	176/179	218/233	180/192	181/185	176/182	290/290
	HG20-17	116/128	223/223	176/179	218/233	178/180	181/185	176/182	278/290
	HG20-18	116/131	229/229	176/179	218/218	178/180	181/181	176/182	290/290
	HG20-19	131/134	229/229	179/194	218/233	178/192	181/185	176/182	278/290
	HG20-20	128/134	223/223	176/179	218/233	178/192	181/185	176/182	284/284
	HG20-21	128/134	223/223	188/194	218/233	180/180	181/185	176/182	278/284
	HG20-22	116/128	229/229	176/179	218/218	180/180	181/185	176/200	278/284
	HG20-23	131/134	223/223	176/179	218/233	178/180	181/185	176/182	278/290
	HG20-24	128/134	223/223	179/194	218/218	178/180	181/185	176/182	278/290
	HG20-25	128/134	223/229	176/179	218/233	178/192	181/181	176/182	284/284
HG21	HG21-1	122/128	211/211	179/182	212/218	180/180	173/185	176/176	275/305
	HG21-2	128/164	256/256	179/182	212/218	180/192	173/185	176/176	275/305
	HG21-3	128/164	256/256	179/194	233/236	188/192	173/185	176/200	275/305
	HG21-4	122/128	211/211	179/194	212/218	180/180	173/185	176/176	275/305
	HG21-5	128/164	211/211	179/182	233/236	180/192	185/185	176/200	na
	HG21-6	122/128	211/211	179/182	233/236	180/188	185/185	176/200	275/275
	HG21-7	122/128	256/256	179/182	212/233	180/188	185/185	176/200	na
	HG21-8	128/164	211/211	179/194	212/233	180/192	173/185	176/200	na
	HG21-9	122/128	211/211	179/194	212/233	180/188	173/185	176/200	275/275
	HG21-10	122/128	211/211	179/182	212/233	180/180	185/185	176/200	275/275
	HG21-11	122/128	256/256	179/194	218/236	180/180	185/185	176/200	na
	HG21-12	122/128	211/211	179/194	233/236	180/180	173/185	176/200	275/305
	HG21-13	122/128	256/256	179/194	212/218	180/192	185/185	176/200	275/275
	HG21-14	128/164	256/256	179/182	218/236	180/180	173/185	176/200	na
	HG21-15	122/128	256/256	179/194	233/236	188/192	173/185	176/200	275/275
	HG21-16	122/128	211/211	179/182	212/218	180/192	173/185	176/176	275/275
	HG21-17	122/128	256/256	179/182	212/233	188/192	173/185	176/176	275/305
	HG21-18	128/164	211/211	179/194	212/233	180/180	185/185	176/176	na
	HG21-19	128/164	211/211	179/182	212/218	180/180	173/185	176/200	275/275
	HG21-20	128/164	256/256	179/194	218/236	188/192	185/185	176/176	305/305
	HG21-21	122/128	256/256	179/182	212/218	180/180	173/185	176/176	275/275
	HG21-22	128/164	211/211	179/194	233/236	188/192	185/185	176/200	na
	HG21-23	128/164	256/256	179/182	212/233	180/192	185/185	176/200	305/305
	HG21-24	128/164	256/256	179/182	212/233	180/188	185/185	176/176	na
	HG21-25	122/128	256/256	179/194	233/236	188/192	173/185	176/200	275/275
HG22	HG22-1	122/164	259/259	170/176	218/218	180/188	169/185	176/200	290/290
	HG22-2	161/164	256/256	170/176	218/233	180/188	169/181	176/200	275/290
	HG22-3	122/164	256/256	176/179	218/218	180/188	169/185	176/200	290/290
	HG22-4	128/128	256/256	176/179	218/233	180/188	169/185	176/182	275/275
	HG22-5	122/164	256/259	170/176	218/218	180/188	169/185	176/182	275/275
	HG22-6	128/164	256/256	170/176	218/218	180/188	169/185	176/200	275/275
	HG22-7	128/164	256/259	176/179	230/230	180/188	169/185	176/200	275/275
	HG22-8	122/164	256/259	170/176	230/230	180/188	169/181	176/182	290/290
	HG22-9	164/164	256/259	170/176	230/230	180/188	169/185	176/182	275/290
	HG22-10	128/164	256/259	176/179	230/230	180/188	169/181	176/200	290/290
	HG22-11	122/128	256/256	170/176	230/230	180/188	169/185	176/200	290/290
	HG22-12	164/164	256/256	170/176	230/230	180/188	169/185	176/200	275/275
	HG22-13	122/128	256/259	170/176	230/230	180/188	169/185	176/182	275/275
	HG22-14	164/164	256/256	176/179	230/230	180/188	169/185	176/200	290/290
	HG22-15	164/164	256/259	176/179	230/230	180/188	169/181	176/182	275/290
	HG22-16	122/164	259/259	170/176	230/230	180/188	169/185	176/200	275/275
	HG22-17	164/164	259/259	176/179	230/230	180/188	169/181	176/200	275/290
	HG22-18	122/164	259/259	176/179	230/230	180/188	169/185	176/182	290/290
	HG22-19	122/164	259/259	176/179	230/230	180/188	169/185	176/182	275/290
	HG22-20	164/164	256/256	176/179	224/233	180/188	169/181	176/182	275/275
	HG22-21	164/164	256/256	176/179	224/233	180/188	169/181	176/182	275/290
	HG22-22	122/164	259/259	170/176	233/233	180/188	169/181	176/200	275/275
	HG22-23	122/164	256/256	170/176	233/233	180/188	169/185	176/200	275/275
	HG22-24	122/164	256/256	170/176	230/230	180/188	169/185	176/200	275/275
	HG22-25	128/128	259/259	176/179	224/233	180/188	169/185	176/182	275/275
HG23	HG23-1	122/128	229/229	176/179	224/233	180/188	185/185	197/200	290/320
	HG23-2	122/128	223/259	176/179	224/233	180/188	165/177	197/200	290/320
	HG23-3	122/122	229/229	179/179	233/233	180/192	165/177	194/200	305/320
	HG23-4	122/122	229/259	179/179	224/233	188/192	165/177	197/200	278/290
	HG23-5	122/122	223/229	179/179	233/236	188/192	165/185	194/200	278/305
	HG23-6	122/122	229/259	176/179	224/233	188/192	165/177	197/200	278/290
	HG23-7	122/128	223/229	176/179	224/236	180/188	185/185	194/200	305/320
	HG23-8	122/122	229/229	176/179	233/236	180/192	185/185	197/200	278/290
	HG23-9	122/122	229/259	176/179	224/236	180/192	165/185	197/200	278/290
	HG23-10	122/128	229/229	176/179	224/236	188/192	165/185	197/200	290/320
	HG23-11	122/128	229/229	176/179	224/236	180/192	165/185	194/200	305/320
	HG23-12	122/128	223/229	176/179	218/233	188/188	185/185	197/200	290/320
	HG23-13	122/128	229/229	179/179	233/233	188/192	165/177	194/200	305/320
	HG23-14	122/128	223/229	176/179	233/233	188/188	165/185	197/200	278/305
	HG23-15	122/128	223/259	176/179	233/233	180/192	165/185	197/200	278/290
	HG23-16	122/122	223/229	176/179	224/236	188/188	185/185	197/200	278/290
	HG23-17	122/128	223/259	179/179	224/233	188/188	177/185	194/200	305/320
	HG23-18	122/122	229/259	179/179	224/233	180/188	185/185	197/200	305/320
	HG23-19	122/122	223/259	176/179	218/233	180/188	177/185	194/200	278/305
	HG23-20	122/122	223/229	179/179	218/218	188/188	165/177	194/200	305/320
	HG23-21	122/128	223/259	176/179	218/233	188/188	185/185	194/200	278/305
	HG23-22	122/122	223/229	176/179	218/218	180/192	165/177	194/200	305/320
	HG23-23	122/122	229/259	176/179	218/218	188/188	185/185	194/200	278/305
	HG23-24	122/128	223/259	176/179	218/218	188/188	177/185	197/200	305/320
	HG23-25	122/128	229/229	179/179	218/233	188/192	165/177	194/200	278/305
HG24	HG24-1	134/164	223/223	176/179	218/218	188/188	177/185	182/182	275/290
	HG24-2	134/164	264/264	176/176	218/218	180/192	185/189	176/182	278/290
	HG24-3	131/164	223/223	176/176	218/236	188/192	177/177	176/182	275/290
	HG24-4	128/131	264/279	176/176	233/233	188/188	185/189	176/182	278/290
	HG24-5	128/134	264/270	176/179	218/218	180/188	185/189	167/176	278/290
	HG24-6	134/164	223/223	179/179	218/233	180/192	177/185	176/182	278/290
	HG24-7	131/164	223/223	176/176	218/218	180/192	177/185	167/176	278/290
	HG24-8	128/131	223/223	179/179	218/218	180/188	177/185	167/176	275/290
	HG24-9	128/131	264/264	176/179	218/233	188/188	177/185	167/176	278/290
	HG24-10	131/164	223/223	176/176	218/218	180/192	185/189	176/182	278/290
	HG24-11	131/164	223/223	179/179	218/236	188/188	177/185	176/182	275/290
	HG24-12	131/164	223/223	176/179	218/233	180/192	177/177	167/182	278/290
	HG24-13	128/131	264/270	176/179	218/236	188/188	177/185	176/182	278/290
	HG24-14	128/131	223/223	176/179	218/218	180/192	177/185	167/176	275/290
	HG24-15	128/131	264/279	176/176	218/218	188/188	177/185	167/176	275/290
	HG24-16	128/131	223/223	176/176	233/233	180/192	177/185	176/182	275/290
	HG24-17	131/164	223/223	176/179	233/233	188/192	177/177	167/176	278/290
	HG24-18	134/164	264/279	176/176	224/233	180/188	185/189	167/176	275/290
	HG24-19	131/164	223/223	176/179	233/233	188/188	177/189	167/182	278/290
	HG24-20	134/164	264/264	176/179	224/233	188/188	177/177	176/182	275/290
	HG24-21	128/134	223/223	176/176	233/233	188/188	177/185	182/182	278/290
	HG24-22	134/164	223/223	176/179	233/233	188/192	177/189	182/182	278/290
	HG24-23	131/164	223/223	179/179	224/233	180/192	185/189	182/182	278/290
	HG24-24	134/164	264/270	176/179	224/233	188/188	177/185	167/182	275/290
	HG24-25	128/134	264/279	176/179	233/233	180/192	185/189	182/182	278/290
HG25	HG25-1	125/128	259/259	179/182	218/233	180/192	189/189	176/176	275/290
	HG25-2	125/128	256/277	179/179	218/218	192/192	181/189	176/176	278/278
	HG25-3	119/128	259/259	170/182	218/218	188/192	181/189	176/176	290/290
	HG25-4	125/128	256/256	170/182	218/233	180/180	173/173	176/176	278/278
	HG25-5	119/128	277/277	179/179	218/218	192/192	173/173	176/176	278/278
	HG25-6	119/128	259/277	170/182	218/218	180/192	173/181	176/176	275/290
	HG25-7	125/128	259/259	179/182	218/233	192/192	173/181	176/176	290/290
	HG25-8	125/128	256/259	179/182	218/218	192/192	177/177	176/176	278/278
	HG25-9	119/128	259/259	179/182	218/233	192/192	181/189	176/176	278/278
	HG25-10	125/128	256/256	179/182	218/218	188/192	181/189	176/176	290/290
	HG25-11	125/128	256/256	170/179	218/233	180/192	181/189	176/176	275/290
	HG25-12	119/128	259/277	179/182	218/218	192/192	173/181	176/176	278/278
	HG25-13	119/128	277/277	179/179	218/233	192/192	173/181	176/176	278/278
	HG25-14	125/128	256/259	179/179	218/218	192/192	181/189	176/176	278/278
	HG25-15	125/128	256/256	179/179	218/233	180/192	173/181	176/176	275/290
	HG25-16	119/128	259/259	179/179	218/218	192/192	181/189	176/176	275/278
	HG25-17	125/128	259/259	179/182	218/218	188/192	173/173	176/176	290/290
	HG25-18	119/128	277/277	179/179	218/233	180/188	173/173	176/176	278/278
	HG25-19	125/128	259/277	179/182	218/218	192/192	173/181	176/176	290/290
	HG25-20	125/128	259/277	179/179	218/233	192/192	173/181	176/176	278/278
	HG25-21	119/128	259/277	179/182	218/218	192/192	181/189	176/176	275/278
	HG25-22	125/128	256/259	179/182	218/233	192/192	173/181	176/176	278/278
	HG25-23	125/128	259/259	179/182	218/218	188/192	177/189	176/176	290/290
	HG25-24	125/128	256/256	170/179	218/218	192/192	181/189	176/176	275/290
	HG25-25	125/128	259/277	179/182	218/218	180/180	173/189	176/176	290/290

## Sheet: SSR data for Changsha (CS)
Sample	Individual	Rf24-2	Rf21-1	Rf6-1	Rf1-3	RS78	RS68	RS10	RS15
CS1	CS1-1	104/107	205/214	161/161	210/215	192/200	173/173	137/170	275/287
	CS1-2	101/104	214/226	161/161	210/215	192/200	173/181	137/170	275/287
	CS1-3	104/107	205/247	161/161	210/210	192/192	173/181	170/170	263/275
	CS1-4	101/107	226/247	161/161	210/210	192/192	173/173	170/170	275/275
	CS1-5	101/101	205/247	161/161	210/215	192/200	173/173	164/170	263/275
	CS1-6	101/101	226/247	161/161	210/215	192/200	173/173	137/164	275/287
	CS1-7	101/104	205/214	161/161	210/215	192/200	173/181	164/170	263/275
	CS1-8	101/107	205/214	161/161	210/210	192/200	173/173	170/170	275/275
	CS1-9	101/107	205/214	161/161	210/210	192/200	173/181	137/164	263/287
	CS1-10	101/104	205/247	161/161	210/210	192/200	173/173	164/170	263/275
	CS1-11	101/101	205/247	161/161	210/215	192/192	173/181	137/170	275/287
	CS1-12	104/107	205/247	161/161	210/215	192/192	173/181	137/170	263/287
	CS1-13	101/104	205/214	161/161	210/215	192/192	173/173	170/170	263/275
	CS1-14	101/101	205/214	161/161	210/215	192/192	173/181	137/170	263/287
	CS1-15	101/101	226/247	161/161	210/210	192/200	173/173	137/164	275/287
	CS1-16	101/104	205/214	161/161	210/210	192/192	173/181	137/170	263/287
	CS1-17	101/104	205/247	161/161	210/210	192/200	173/181	137/170	263/287
	CS1-18	101/101	205/214	161/161	210/215	192/200	173/173	137/164	275/287
	CS1-19	101/104	205/247	161/161	215/215	192/200	173/173	164/170	263/275
	CS1-20	104/107	214/226	161/161	210/210	192/192	173/181	170/170	263/275
	CS1-21	101/104	214/226	161/161	210/215	192/192	173/181	137/170	275/287
	CS1-22	101/101	205/247	161/161	210/210	192/192	173/181	137/170	263/287
	CS1-23	101/101	214/226	161/161	210/215	192/200	173/181	137/164	275/287
	CS1-24	101/101	205/247	161/161	210/210	192/192	173/181	137/170	263/287
	CS1-25	101/101	226/247	161/161	215/215	192/200	173/181	170/170	275/275
CS2	CS2-1	101/113	208/208	164/170	210/210	192/192	181/189	164/164	269/287
	CS2-2	101/113	214/214	164/170	210/210	204/204	173/181	164/167	263/269
	CS2-3	101/113	208/208	164/170	210/210	192/192	173/181	164/164	263/269
	CS2-4	101/113	205/214	161/164	210/210	192/192	181/189	164/164	263/269
	CS2-5	101/101	208/208	164/170	210/210	204/204	173/181	164/164	263/269
	CS2-6	101/113	214/226	164/170	210/210	192/192	181/189	164/164	263/269
	CS2-7	101/113	214/214	164/170	210/210	204/204	181/189	164/167	263/269
	CS2-8	101/101	208/208	164/170	210/210	204/204	181/189	164/167	269/287
	CS2-9	101/113	208/226	161/164	210/210	204/204	181/189	164/167	263/269
	CS2-10	101/113	214/226	164/170	210/210	192/192	173/181	164/167	263/269
	CS2-11	101/113	214/226	161/164	210/210	204/204	173/181	164/167	269/287
	CS2-12	101/113	214/226	161/164	210/210	192/192	173/181	164/164	263/269
	CS2-13	101/101	214/214	164/170	210/210	192/192	181/189	164/164	269/287
	CS2-14	101/113	208/208	161/164	210/210	192/192	181/189	164/164	263/269
	CS2-15	na	208/226	161/164	210/210	192/192	181/189	164/164	269/287
	CS2-16	101/113	208/226	161/164	210/210	204/204	181/189	164/167	269/287
	CS2-17	101/101	214/214	164/170	210/210	204/204	173/181	164/167	263/269
	CS2-18	101/113	214/226	161/164	210/210	192/192	181/189	164/164	263/269
	CS2-19	101/101	214/214	164/170	210/210	204/204	181/189	164/167	263/269
	CS2-20	101/101	214/214	161/164	210/210	192/192	173/181	164/164	263/269
	CS2-21	101/101	214/226	161/164	210/210	204/204	181/189	164/167	269/287
	CS2-22	101/101	214/226	164/170	210/210	204/204	181/189	164/167	269/287
	CS2-23	101/113	214/214	161/164	210/210	192/192	173/181	164/164	263/269
	CS2-24	101/113	208/226	164/170	210/210	204/204	181/189	164/167	263/269
	CS2-25	101/101	208/226	161/164	210/210	204/204	173/181	164/164	263/269
CS3	CS3-1	101/101	208/208	164/170	210/210	204/204	181/189	164/164	269/287
	CS3-2	101/113	214/226	164/170	210/210	204/204	173/181	164/167	269/287
	CS3-3	101/101	208/208	161/164	210/210	204/204	173/181	164/167	269/287
	CS3-4	101/101	208/208	161/164	210/210	204/204	181/189	164/167	269/287
	CS3-5	101/113	208/208	164/170	210/210	204/204	173/181	164/167	263/269
	CS3-6	101/113	214/214	164/170	210/210	192/204	181/189	164/167	263/269
	CS3-7	101/101	214/226	164/170	210/210	192/192	173/181	164/164	269/287
	CS3-8	101/113	208/208	161/164	210/210	192/192	181/189	164/164	269/287
	CS3-9	101/113	208/208	164/170	210/210	204/204	181/189	164/167	269/287
	CS3-10	101/101	208/208	161/164	210/210	192/192	181/189	164/167	269/287
	CS3-11	101/113	214/214	164/170	210/210	204/204	173/181	164/167	263/269
	CS3-12	101/101	214/226	161/164	210/210	192/192	181/189	164/164	269/287
	CS3-13	101/101	208/226	164/170	210/210	204/204	181/189	164/167	269/287
	CS3-14	101/113	208/226	164/170	210/210	204/204	181/189	164/167	263/269
	CS3-15	101/101	208/226	161/164	210/210	204/204	173/181	164/167	263/269
	CS3-16	101/101	214/214	161/164	210/210	192/192	181/189	164/164	263/269
	CS3-17	101/113	208/208	164/170	210/210	192/192	181/189	164/167	263/269
	CS3-18	101/113	214/214	164/170	210/210	192/192	173/181	164/164	269/287
	CS3-19	101/101	214/214	na	210/210	204/204	173/181	164/167	263/269
	CS3-20	101/101	214/214	164/170	210/210	204/204	173/173	164/164	269/287
	CS3-21	101/113	214/214	164/170	210/210	204/204	181/189	164/167	263/269
	CS3-22	101/101	214/214	161/164	210/210	204/204	181/189	164/167	263/269
	CS3-23	101/101	208/208	164/170	210/210	192/192	173/181	164/164	263/269
	CS3-24	101/113	214/214	161/164	210/210	204/204	181/189	164/167	269/287
	CS3-25	101/101	214/214	na	210/210	na	173/173	na	na
CS4	CS4-1	104/107	226/226	173/176	210/210	192/200	173/181	164/164	275/275
	CS4-2	101/104	214/247	161/176	210/210	192/192	173/173	164/164	263/275
	CS4-3	104/107	226/226	161/173	210/210	192/192	173/181	164/164	263/263
	CS4-4	104/107	226/247	173/176	210/210	200/200	173/181	164/164	263/275
	CS4-5	101/107	226/226	161/173	210/210	192/192	173/173	164/164	275/275
	CS4-6	101/104	226/247	161/173	210/210	192/192	173/173	164/164	263/275
	CS4-7	101/104	226/226	173/176	210/210	200/200	173/173	164/164	263/263
	CS4-8	101/101	226/247	161/173	210/210	192/192	173/181	164/164	263/275
	CS4-9	101/107	214/247	161/173	210/210	192/200	173/181	164/164	263/263
	CS4-10	101/104	214/214	161/176	210/210	192/192	173/181	164/164	263/275
	CS4-11	101/101	214/226	161/173	210/210	192/192	173/181	164/164	263/275
	CS4-12	104/107	226/226	161/176	210/210	192/192	173/173	164/164	263/275
	CS4-13	101/107	226/226	161/176	210/210	200/200	173/173	164/164	275/275
	CS4-14	101/104	214/226	161/176	210/210	192/192	173/173	164/164	263/275
	CS4-15	104/107	214/247	161/176	210/210	192/192	173/173	164/164	263/275
	CS4-16	101/104	214/226	161/176	210/210	192/192	173/181	164/164	275/275
	CS4-17	101/101	214/247	173/176	210/210	200/200	173/181	164/164	263/263
	CS4-18	101/107	214/226	176/176	210/210	200/200	173/173	164/164	263/275
	CS4-19	101/107	226/247	176/176	210/210	192/192	173/173	164/164	275/275
	CS4-20	104/107	226/247	173/176	210/210	192/192	173/181	164/164	263/275
	CS4-21	104/107	214/214	176/176	210/210	192/192	173/181	164/164	275/275
	CS4-22	104/107	226/226	161/176	210/210	192/192	173/181	164/164	275/275
	CS4-23	101/104	214/247	173/176	210/210	192/200	173/173	164/164	263/275
	CS4-24	101/104	214/226	176/176	210/210	192/200	173/181	164/164	263/275
	CS4-25	101/101	226/247	161/176	210/210	200/200	173/181	164/164	263/263
CS5	CS5-1	107/107	214/214	179/179	210/210	188/188	173/173	167/167	275/275
	CS5-2	107/107	214/214	179/179	210/210	188/192	173/173	167/167	275/275
	CS5-3	107/107	223/223	161/161	210/210	188/192	173/173	167/167	275/275
	CS5-4	107/107	214/214	161/161	210/210	188/192	173/173	167/170	275/275
	CS5-5	107/107	223/223	161/179	210/210	188/192	173/173	167/170	275/275
	CS5-6	107/107	214/223	161/179	210/210	188/192	173/173	167/170	275/275
	CS5-7	107/107	214/214	161/161	210/210	188/192	173/173	167/170	275/275
	CS5-8	107/107	214/223	179/179	210/210	188/188	173/173	167/170	275/275
	CS5-9	107/107	214/223	161/179	210/210	188/188	173/173	167/170	275/275
	CS5-10	107/107	223/223	179/179	210/210	188/192	na	167/167	275/275
	CS5-11	107/107	223/223	161/179	210/210	188/192	173/173	167/170	275/275
	CS5-12	107/107	223/223	161/161	210/210	188/188	173/173	167/167	275/275
	CS5-13	107/107	223/223	179/179	210/210	188/192	173/173	170/170	275/275
	CS5-14	107/107	223/223	179/179	210/210	188/192	173/173	170/170	275/275
	CS5-15	107/107	214/223	179/179	210/210	188/192	173/173	167/167	275/275
	CS5-16	107/107	214/223	161/179	210/210	188/188	173/173	167/167	275/275
	CS5-17	107/107	214/223	161/161	210/210	188/188	173/173	170/170	275/275
	CS5-18	107/107	223/223	179/179	210/210	188/192	173/173	167/170	275/275
	CS5-19	107/107	214/223	161/179	210/210	188/192	173/173	167/170	275/275
	CS5-20	107/107	214/214	161/179	210/210	188/188	173/173	170/170	275/275
	CS5-21	107/107	223/223	161/161	210/210	188/188	173/173	167/170	275/275
	CS5-22	107/107	223/223	161/179	210/210	188/192	173/173	167/167	275/275
	CS5-23	107/107	214/223	161/179	210/210	188/188	173/173	167/167	275/275
	CS5-24	107/107	214/223	161/179	210/210	188/188	173/173	167/167	275/275
	CS5-25	101/113	214/214	na	210/210	204/204	181/189	na	263/269
CS6	CS6-1	101/107	205/226	164/176	210/210	204/204	181/185	167/170	275/284
	CS6-2	107/113	226/241	164/170	210/210	188/192	173/181	164/167	275/284
	CS6-3	101/107	205/226	164/176	210/210	192/192	173/173	164/167	275/284
	CS6-4	101/107	214/241	164/170	210/210	192/192	173/173	164/167	275/284
	CS6-5	107/113	205/214	164/176	210/210	192/192	181/185	167/170	275/284
	CS6-6	101/107	214/241	167/170	210/210	192/192	173/181	167/170	275/284
	CS6-7	107/113	226/241	167/170	210/210	204/204	181/185	164/167	275/284
	CS6-8	107/113	205/226	167/176	210/210	192/192	173/185	164/167	275/284
	CS6-9	101/107	214/241	164/176	210/210	192/192	173/185	164/167	275/284
	CS6-10	101/107	226/241	167/176	210/210	192/192	181/185	164/167	275/284
	CS6-11	101/107	205/214	167/176	210/210	204/204	173/185	167/170	275/284
	CS6-12	107/113	205/226	164/176	210/210	192/192	181/185	164/167	275/284
	CS6-13	107/113	205/226	167/176	210/210	192/192	181/185	167/170	275/284
	CS6-14	107/113	214/241	167/170	210/210	192/192	173/185	164/167	275/284
	CS6-15	101/107	214/241	167/170	210/210	204/204	173/181	164/167	275/284
	CS6-16	101/107	205/214	167/170	210/210	192/192	173/173	164/167	275/284
	CS6-17	101/107	226/241	164/176	210/210	204/204	173/173	167/170	275/284
	CS6-18	107/113	214/241	167/176	210/210	204/204	173/173	167/170	275/284
	CS6-19	107/113	214/241	164/170	210/210	192/192	173/181	167/170	275/284
	CS6-20	101/107	214/241	167/176	210/210	204/204	173/173	167/170	275/284
	CS6-21	107/113	205/226	167/170	210/210	192/196	181/185	167/170	275/284
	CS6-22	107/113	205/214	164/176	210/210	204/204	173/185	167/170	275/284
	CS6-23	101/107	214/241	164/176	210/210	204/204	173/181	167/170	275/284
	CS6-24	107/113	205/214	164/170	210/210	204/204	173/181	164/167	275/284
	CS6-25	107/113	214/241	167/170	210/210	204/204	173/181	167/170	275/284
CS7	CS7-1	101/110	226/259	164/176	215/215	192/196	173/177	140/164	263/275
	CS7-2	101/110	205/226	164/182	210/210	192/192	173/173	164/164	269/281
	CS7-3	110/110	205/259	170/176	210/210	192/192	173/185	140/164	263/275
	CS7-4	101/110	226/259	164/182	210/210	192/192	173/173	164/164	269/281
	CS7-5	110/110	205/259	164/182	210/210	192/192	173/173	140/164	275/281
	CS7-6	101/110	205/205	164/176	210/215	192/192	173/177	164/164	269/281
	CS7-7	110/110	226/259	170/176	210/215	192/192	173/175	164/164	263/275
	CS7-8	101/110	205/205	170/182	210/210	192/192	177/185	164/164	263/269
	CS7-9	110/110	226/259	164/176	210/215	192/192	173/173	164/164	275/281
	CS7-10	101/110	205/259	170/182	210/210	192/192	173/173	164/164	263/269
	CS7-11	101/110	205/205	170/176	210/215	192/192	173/177	164/164	263/275
	CS7-12	101/110	205/226	164/182	210/215	192/192	177/185	164/164	263/275
	CS7-13	110/110	205/226	164/182	210/210	192/192	173/177	140/164	269/281
	CS7-14	101/110	205/205	170/182	210/215	192/192	173/185	164/164	263/269
	CS7-15	101/110	205/205	164/176	210/210	192/192	177/185	164/164	269/281
	CS7-16	110/110	205/205	164/176	210/210	192/192	173/177	164/164	269/281
	CS7-17	101/110	205/226	170/182	210/215	192/192	173/177	140/164	269/281
	CS7-18	101/110	205/259	164/182	210/210	192/192	173/185	164/164	263/275
	CS7-19	101/110	226/259	170/182	210/210	192/192	173/177	140/164	263/269
	CS7-20	110/110	205/205	164/176	210/210	192/192	173/173	140/164	263/275
	CS7-21	110/110	205/259	164/182	210/215	192/192	177/185	140/164	263/269
	CS7-22	110/110	205/259	164/182	210/215	192/192	177/185	164/164	269/281
	CS7-23	101/110	205/259	170/176	210/215	192/192	173/177	164/164	263/275
	CS7-24	110/110	205/259	164/176	210/210	192/192	173/177	140/164	263/275
	CS7-25	110/110	205/259	164/182	210/215	192/192	173/185	140/167	263/275
CS8	CS8-1	113/119	214/238	161/164	210/210	188/188	185/189	164/164	275/275
	CS8-2	104/110	214/238	158/170	210/210	188/188	185/189	164/164	275/275
	CS8-3	104/110	223/238	161/164	210/210	192/192	173/181	137/164	275/275
	CS8-4	110/113	238/238	158/170	210/210	192/192	181/189	164/164	263/275
	CS8-5	113/119	223/238	158/161	210/210	192/192	173/185	137/164	263/275
	CS8-6	104/119	214/223	158/161	210/210	188/188	173/185	164/164	275/275
	CS8-7	110/113	214/238	158/161	210/210	192/192	173/185	137/164	263/275
	CS8-8	104/110	238/238	161/164	210/210	192/192	173/185	164/164	275/275
	CS8-9	110/113	223/238	158/161	210/210	188/188	173/185	137/164	275/275
	CS8-10	104/110	223/238	161/164	210/210	188/188	185/189	164/164	275/275
	CS8-11	110/113	238/238	158/161	210/210	192/192	185/189	164/164	263/275
	CS8-12	104/119	214/223	164/170	210/210	192/192	173/185	137/164	263/275
	CS8-13	104/110	214/238	161/164	210/210	192/192	185/189	164/164	263/275
	CS8-14	110/113	223/238	158/170	210/210	188/188	185/189	164/164	263/275
	CS8-15	104/110	238/238	161/164	210/210	192/192	173/185	164/164	275/275
	CS8-16	110/113	238/238	158/161	210/210	192/192	185/189	164/164	263/275
	CS8-17	110/113	214/223	164/170	210/210	188/188	173/185	137/164	263/275
	CS8-18	110/113	238/238	161/164	210/210	188/188	185/189	164/164	275/275
	CS8-19	104/119	214/238	164/170	210/210	192/192	173/185	164/164	275/275
	CS8-20	104/119	214/238	161/164	210/210	188/188	185/189	164/164	275/275
	CS8-21	104/119	214/223	164/170	210/210	188/188	173/185	137/164	263/275
	CS8-22	113/119	214/223	158/170	210/210	192/192	181/189	137/164	263/275
	CS8-23	104/119	238/238	158/161	210/210	188/188	173/185	137/164	275/275
	CS8-24	110/113	238/238	161/164	210/210	192/192	181/189	137/164	263/275
	CS8-25	113/119	214/223	158/170	210/210	192/192	181/189	164/164	263/275
CS9	CS9-1	101/110	na	182/182	210/210	192/192	185/185	164/170	275/275
	CS9-2	101/101	214/232	161/182	210/210	192/192	185/185	164/164	275/275
	CS9-3	107/110	205/232	182/182	210/210	192/192	185/185	164/164	263/275
	CS9-4	101/110	205/205	161/167	218/218	192/192	181/181	164/164	275/275
	CS9-5	101/110	205/232	182/182	210/210	192/192	181/185	164/164	263/275
	CS9-6	101/101	232/244	182/182	218/218	192/192	185/185	164/164	275/275
	CS9-7	101/110	232/244	167/170	na	192/192	173/185	164/170	275/275
	CS9-8	101/110	205/205	161/170	210/210	192/192	173/185	164/170	263/275
	CS9-9	101/110	214/232	161/167	210/210	192/192	181/185	164/170	275/275
	CS9-10	101/110	205/232	161/167	210/210	192/192	181/185	164/170	263/275
	CS9-11	101/107	205/232	182/182	210/210	192/192	181/185	164/164	263/275
	CS9-12	101/101	205/205	170/182	218/218	192/192	185/185	164/170	275/275
	CS9-13	101/107	205/232	170/182	218/218	192/192	173/185	170/170	275/275
	CS9-14	101/107	214/214	170/182	210/210	192/192	185/185	164/164	275/275
	CS9-15	101/107	205/232	167/170	210/210	192/192	181/185	164/164	263/275
	CS9-16	107/107	214/232	167/170	210/218	192/192	173/181	164/164	275/275
	CS9-17	101/107	232/244	182/182	210/210	192/192	181/185	164/164	263/275
	CS9-18	107/110	214/232	161/167	210/210	192/192	181/181	164/170	275/275
	CS9-19	101/107	214/232	167/170	210/210	192/192	173/181	164/164	263/275
	CS9-20	101/101	205/244	161/167	210/210	192/192	185/185	170/170	263/275
	CS9-21	101/101	205/232	182/182	218/218	192/192	181/185	164/164	275/275
	CS9-22	107/110	214/244	161/182	218/218	192/192	181/181	164/164	275/275
	CS9-23	101/101	232/244	161/182	218/218	192/192	181/185	164/164	275/275
	CS9-24	101/101	205/232	167/170	218/218	192/192	173/185	170/170	275/275
	CS9-25	101/101	232/244	170/170	218/218	192/192	173/185	164/164	263/275
CS10	CS10-1	101/110	217/238	170/182	210/210	188/188	173/181	164/164	263/275
	CS10-2	101/110	217/232	161/170	210/210	188/188	181/181	164/164	263/275
	CS10-3	101/143	217/232	na	210/210	188/188	173/181	164/164	263/263
	CS10-4	110/143	217/232	161/182	210/210	188/188	181/181	164/164	263/275
	CS10-5	101/143	217/232	161/170	210/210	188/188	173/173	164/164	263/263
	CS10-6	110/143	217/232	170/182	210/210	188/188	181/181	164/164	263/263
	CS10-7	110/143	217/238	161/182	210/210	188/188	173/181	164/164	263/275
	CS10-8	110/143	217/238	161/161	210/210	188/188	181/181	164/164	263/263
	CS10-9	110/143	217/238	na	210/210	188/188	173/181	164/164	263/263
	CS10-10	110/143	217/238	161/161	210/210	188/188	181/181	164/164	263/263
	CS10-11	110/143	217/238	161/170	210/210	188/188	173/181	164/164	263/263
	CS10-12	110/143	217/238	161/182	210/210	188/188	173/181	164/164	263/263
	CS10-13	101/143	217/238	161/182	210/210	188/188	173/181	164/164	263/263
	CS10-14	110/143	217/238	161/170	210/210	188/188	181/181	164/164	263/263
	CS10-15	101/143	217/232	161/182	210/210	188/188	173/181	164/164	263/275
	CS10-16	101/110	217/238	161/170	210/210	188/188	173/181	164/164	263/275
	CS10-17	110/143	217/232	161/161	210/210	188/188	173/181	164/164	263/263
	CS10-18	110/143	217/232	161/170	210/210	188/188	181/181	164/164	263/263
	CS10-19	101/143	217/238	161/170	210/210	188/188	173/181	164/164	263/275
	CS10-20	101/143	217/238	170/182	210/210	188/188	173/181	164/164	263/263
	CS10-21	110/143	217/238	161/170	210/210	188/188	173/181	164/164	263/275
	CS10-22	101/110	217/238	161/161	210/210	188/188	181/181	164/164	263/263
	CS10-23	110/143	217/238	161/170	210/210	188/188	181/181	164/164	263/263
	CS10-24	101/110	217/238	170/182	210/210	188/188	181/181	164/164	263/275
	CS10-25	101/143	217/232	161/170	210/210	188/188	181/181	164/164	263/263
CS11	CS11-1	101/101	208/214	170/176	210/210	192/192	177/189	164/170	263/287
	CS11-2	101/137	217/220	164/176	210/210	188/192	177/189	143/170	263/287
	CS11-3	110/137	217/220	161/170	210/210	188/192	173/189	164/170	263/287
	CS11-4	110/137	208/220	161/170	210/210	192/192	177/181	164/167	263/275
	CS11-5	101/101	214/217	164/176	210/210	204/204	177/181	143/170	263/287
	CS11-6	101/137	208/214	164/176	210/210	204/204	177/189	164/167	263/275
	CS11-7	110/137	214/217	161/170	210/210	188/192	177/181	143/167	263/275
	CS11-8	101/101	208/220	161/170	210/210	188/192	177/181	143/170	263/287
	CS11-9	110/137	214/217	161/170	210/210	204/204	173/189	143/167	263/275
	CS11-10	101/110	208/214	170/176	210/210	192/192	177/181	164/170	263/287
	CS11-11	101/101	208/220	161/170	210/210	192/192	173/189	164/170	263/287
	CS11-12	101/110	217/220	161/170	210/210	204/204	173/189	164/170	263/287
	CS11-13	101/101	214/217	170/176	210/210	204/204	173/189	164/167	263/275
	CS11-14	110/137	208/214	161/170	210/210	192/192	173/181	143/167	263/275
	CS11-15	101/110	208/220	161/170	210/210	204/204	173/181	143/167	263/287
	CS11-16	110/137	217/220	161/170	210/210	192/204	173/181	143/167	263/275
	CS11-17	101/101	214/217	164/176	210/210	192/204	177/181	143/167	263/275
	CS11-18	101/137	208/214	161/170	210/210	192/192	177/189	143/167	263/275
	CS11-19	101/101	208/220	170/176	210/215	192/192	177/189	164/167	263/275
	CS11-20	101/101	214/217	164/176	210/210	204/204	173/189	164/170	263/287
	CS11-21	110/137	217/220	170/176	210/210	188/192	173/189	164/170	263/287
	CS11-22	101/110	208/220	164/176	210/210	192/204	177/189	164/167	263/275
	CS11-23	110/137	208/214	170/176	210/210	204/204	173/189	143/170	263/287
	CS11-24	110/137	208/220	170/176	210/215	204/204	177/189	143/170	263/287
	CS11-25	101/137	217/220	164/176	210/215	192/204	173/181	143/167	263/275
CS12	CS12-1	101/104	205/208	164/173	210/210	184/184	173/181	164/164	263/275
	CS12-2	104/113	196/208	161/173	210/215	184/184	173/173	164/170	263/275
	CS12-3	101/104	205/208	161/179	210/210	192/192	177/181	164/170	263/275
	CS12-4	104/113	208/208	164/173	210/215	184/184	173/181	164/164	263/275
	CS12-5	101/104	208/208	164/179	210/215	184/184	173/181	164/164	275/275
	CS12-6	104/113	196/208	161/179	210/210	188/192	173/181	164/170	275/275
	CS12-7	104/113	208/208	164/173	210/215	188/192	173/181	164/164	275/275
	CS12-8	101/104	208/208	161/179	210/210	184/184	173/173	164/170	275/275
	CS12-9	104/113	205/208	161/179	210/210	184/184	173/173	164/164	263/275
	CS12-10	101/104	196/208	161/173	210/215	184/184	177/181	164/164	275/275
	CS12-11	104/113	205/208	161/173	210/210	188/192	173/173	164/164	275/275
	CS12-12	104/113	208/208	164/173	210/210	192/192	173/173	164/164	263/275
	CS12-13	104/113	205/208	161/173	210/210	192/192	173/181	164/170	263/275
	CS12-14	104/113	208/208	161/179	210/215	184/184	177/181	164/170	263/275
	CS12-15	104/113	205/208	164/179	210/215	184/188	173/181	164/170	263/275
	CS12-16	101/104	196/208	164/173	210/215	192/192	173/173	164/164	275/275
	CS12-17	101/104	208/208	164/173	210/210	188/192	177/181	164/170	263/275
	CS12-18	101/104	205/208	161/173	210/215	192/192	173/181	164/164	263/275
	CS12-19	101/104	196/208	161/173	210/210	188/192	173/181	164/170	275/275
	CS12-20	101/104	208/208	161/173	210/210	184/184	173/173	164/164	275/275
	CS12-21	104/113	196/208	164/179	210/210	184/188	173/177	164/170	275/275
	CS12-22	101/104	208/208	161/173	210/210	184/184	173/181	164/170	263/275
	CS12-23	101/104	205/208	161/173	210/210	184/184	173/177	164/164	263/275
	CS12-24	104/113	196/196	164/179	210/210	184/188	173/177	164/170	263/275
	CS12-25	101/104	208/208	161/173	210/210	188/188	173/173	164/170	275/275
CS13	CS13-1	101/101	211/211	164/176	210/210	192/200	173/173	164/164	269/275
	CS13-2	101/101	211/256	167/179	210/210	188/200	173/173	164/164	269/275
	CS13-3	101/107	211/211	167/179	210/210	192/200	173/181	164/170	269/275
	CS13-4	101/110	211/256	164/176	210/210	192/192	173/181	164/170	263/275
	CS13-5	101/101	211/211	164/176	210/210	188/200	173/181	137/164	263/275
	CS13-6	101/107	211/211	164/167	210/210	192/200	173/173	137/164	263/275
	CS13-7	101/107	211/256	176/179	210/210	188/200	173/173	137/170	263/275
	CS13-8	101/110	211/256	164/176	210/210	192/192	173/173	137/164	263/275
	CS13-9	na	211/211	164/167	210/210	188/188	173/181	164/170	269/275
	CS13-10	101/107	211/256	167/179	210/210	188/188	173/181	164/170	269/275
	CS13-11	101/107	211/256	164/167	210/210	192/200	173/181	164/164	269/275
	CS13-12	107/110	211/211	167/179	210/210	192/200	173/173	164/164	269/275
	CS13-13	101/107	211/256	164/167	210/210	192/200	173/173	137/170	263/275
	CS13-14	107/110	211/211	164/167	210/210	192/200	173/173	164/164	269/275
	CS13-15	101/107	211/211	167/179	210/210	192/200	173/173	164/164	269/275
	CS13-16	101/101	211/211	167/179	210/210	188/200	173/173	137/164	263/275
	CS13-17	101/101	211/211	164/176	210/210	192/200	173/173	164/164	269/275
	CS13-18	101/107	211/256	164/167	210/210	192/192	173/173	137/170	263/275
	CS13-19	101/110	211/256	167/179	210/210	188/200	173/181	164/164	269/275
	CS13-20	101/107	211/211	164/167	210/210	192/200	173/173	137/164	263/275
	CS13-21	101/110	211/256	176/179	210/210	192/200	173/181	137/170	263/275
	CS13-22	101/107	211/256	164/167	210/210	192/192	173/181	137/164	263/275
	CS13-23	107/110	211/211	164/167	210/210	192/200	173/173	164/164	269/275
	CS13-24	101/110	211/211	176/179	210/210	192/200	173/173	164/164	269/275
	CS13-25	101/101	211/256	164/167	210/210	188/200	173/173	164/164	269/275
CS14	CS14-1	101/113	217/238	161/164	210/210	192/192	185/189	164/164	263/275
	CS14-2	101/107	217/223	164/164	210/210	184/184	181/185	140/164	263/275
	CS14-3	101/107	217/223	161/164	210/210	184/184	181/189	140/164	263/263
	CS14-4	101/107	217/217	161/164	210/210	184/184	181/189	140/164	263/263
	CS14-5	101/107	223/238	161/164	210/210	192/192	181/189	164/164	263/275
	CS14-6	101/107	217/223	161/164	210/210	184/184	185/185	140/164	263/275
	CS14-7	101/107	217/223	161/164	210/210	184/184	181/189	164/164	263/275
	CS14-8	101/107	217/238	161/164	210/210	192/192	185/189	164/164	263/275
	CS14-9	101/113	217/223	161/164	210/210	184/184	185/185	140/164	263/275
	CS14-10	101/107	223/238	161/164	210/210	192/192	185/189	140/164	263/263
	CS14-11	101/113	217/217	161/164	210/210	184/184	185/185	140/164	263/263
	CS14-12	101/113	217/223	164/164	210/210	192/192	185/189	164/164	263/263
	CS14-13	101/113	223/238	164/164	210/210	184/184	185/185	164/164	263/263
	CS14-14	101/107	217/223	164/164	210/210	184/184	181/189	140/164	263/263
	CS14-15	101/107	223/238	161/164	210/210	192/192	181/189	140/164	263/263
	CS14-16	101/107	223/238	161/164	210/210	192/192	185/185	140/164	263/275
	CS14-17	101/113	217/217	161/164	210/210	192/192	185/185	164/164	263/275
	CS14-18	101/107	223/238	161/164	210/210	184/184	181/185	164/164	263/263
	CS14-19	101/107	217/217	164/164	210/210	184/184	185/189	164/164	263/275
	CS14-20	101/113	223/238	161/164	210/210	184/184	185/185	140/164	263/263
	CS14-21	101/113	217/217	161/164	210/210	192/192	181/185	164/164	263/263
	CS14-22	101/107	217/217	164/164	210/210	184/184	181/189	164/164	263/275
	CS14-23	101/113	217/217	161/164	210/210	184/184	181/189	140/164	263/263
	CS14-24	101/107	217/217	164/164	210/210	192/192	181/189	140/164	263/275
	CS14-25	101/113	217/217	161/164	210/210	184/184	181/185	140/164	263/275
CS15	CS15-1	104/110	211/229	173/179	210/210	188/188	181/185	na	263/275
	CS15-2	104/110	211/229	173/179	210/210	188/188	181/185	164/170	263/275
	CS15-3	104/104	211/229	164/176	210/210	192/192	181/185	164/170	263/275
	CS15-4	110/113	211/223	164/176	210/210	188/188	177/181	164/170	263/263
	CS15-5	104/104	211/223	173/179	210/210	192/192	173/177	164/170	263/275
	CS15-6	104/110	211/229	164/173	210/210	192/192	181/185	164/167	263/263
	CS15-7	110/113	211/229	164/176	210/210	188/188	173/185	164/170	275/275
	CS15-8	110/113	211/229	173/179	210/210	192/192	177/181	164/170	275/275
	CS15-9	104/104	211/229	164/173	210/210	192/192	173/185	164/167	263/263
	CS15-10	110/113	211/223	173/179	210/210	192/192	177/181	164/167	275/275
	CS15-11	104/113	211/223	173/179	210/210	192/192	177/181	164/167	263/263
	CS15-12	104/113	211/229	176/179	210/210	188/188	181/185	164/167	263/275
	CS15-13	104/113	211/229	164/173	210/210	192/192	173/185	164/167	263/263
	CS15-14	110/113	211/223	164/173	210/210	188/188	181/185	164/170	263/275
	CS15-15	104/104	211/229	164/173	210/210	192/192	181/185	164/167	263/275
	CS15-16	104/113	211/223	173/179	210/210	188/188	181/185	164/170	275/275
	CS15-17	104/110	211/229	173/179	210/210	188/188	173/185	164/167	263/275
	CS15-18	110/113	211/223	176/179	210/210	188/188	177/181	164/170	275/275
	CS15-19	104/110	211/229	164/176	210/210	192/192	173/177	164/170	263/275
	CS15-20	104/110	211/229	164/176	210/210	188/188	173/185	164/170	275/275
	CS15-21	104/113	211/223	173/179	210/210	188/188	173/177	164/167	263/275
	CS15-22	110/113	211/229	176/179	210/210	188/188	173/185	164/167	263/263
	CS15-23	110/113	211/223	164/173	210/210	188/188	173/185	164/167	263/263
	CS15-24	104/104	211/223	173/179	210/210	192/192	173/177	164/167	263/263
	CS15-25	104/113	211/223	173/179	210/210	192/192	181/185	164/170	275/275
CS16	CS16-1	110/110	214/244	170/176	210/210	192/196	181/185	164/173	263/275
	CS16-2	110/110	214/244	170/170	210/210	192/196	181/185	164/173	275/287
	CS16-3	101/110	214/244	170/170	210/210	192/196	169/181	164/173	275/287
	CS16-4	110/110	214/244	170/176	210/210	192/196	181/185	164/173	275/287
	CS16-5	110/110	214/244	170/176	210/210	192/196	169/181	164/164	263/275
	CS16-6	101/101	214/244	170/176	210/210	192/196	169/181	164/164	275/287
	CS16-7	110/110	214/244	170/176	210/210	192/196	169/181	164/164	275/287
	CS16-8	98/98	214/244	170/170	210/210	192/196	169/181	164/173	275/287
	CS16-9	101/110	214/244	170/176	210/210	192/196	169/181	164/164	263/275
	CS16-10	101/110	214/244	170/176	210/210	192/196	169/181	164/164	263/275
	CS16-11	110/110	214/244	170/170	210/210	192/196	181/185	164/173	275/287
	CS16-12	101/101	214/244	170/170	210/210	192/196	169/181	164/164	263/275
	CS16-13	101/101	214/244	170/170	210/210	192/196	181/185	164/164	263/275
	CS16-14	101/101	214/244	170/176	210/210	192/196	181/185	164/173	275/287
	CS16-15	101/110	214/244	170/170	210/210	192/196	169/181	164/173	275/287
	CS16-16	110/110	214/244	170/170	210/210	192/196	169/181	164/173	275/287
	CS16-17	110/110	214/244	170/170	210/210	192/196	181/185	164/173	275/287
	CS16-18	101/101	214/244	170/170	210/210	192/196	169/181	164/164	275/287
	CS16-19	101/110	214/244	170/176	210/210	192/196	181/185	164/164	263/275
	CS16-20	110/110	214/244	170/176	210/210	192/196	169/181	164/173	275/287
	CS16-21	101/110	214/244	170/176	210/210	192/196	181/185	164/173	275/287
	CS16-22	101/101	214/244	170/170	210/210	192/196	181/185	164/164	263/275
	CS16-23	110/110	214/244	170/176	210/210	192/196	181/185	164/164	275/287
	CS16-24	110/110	214/244	170/170	210/210	192/196	181/185	164/164	263/275
	CS16-25	101/101	214/244	170/176	210/210	192/196	169/181	164/164	275/287
CS17	CS17-1	104/110	208/220	164/173	210/210	192/192	173/173	164/170	263/263
	CS17-2	104/110	223/223	164/173	210/210	196/196	185/189	164/170	263/263
	CS17-3	104/110	208/220	164/167	210/210	188/192	181/185	164/170	263/263
	CS17-4	104/110	220/223	161/173	210/210	188/188	181/185	167/170	263/263
	CS17-5	110/110	208/223	164/167	210/210	188/192	181/185	164/170	263/263
	CS17-6	110/110	220/223	164/167	210/210	188/188	173/173	167/173	263/269
	CS17-7	104/110	220/223	164/167	210/210	188/188	181/189	167/170	263/269
	CS17-8	104/110	208/223	164/167	210/210	188/188	173/189	167/173	263/269
	CS17-9	110/110	208/220	164/167	210/210	188/188	173/189	164/170	263/269
	CS17-10	110/110	208/223	161/173	210/210	196/196	173/173	167/170	263/269
	CS17-11	110/110	208/223	161/167	210/210	188/192	173/185	164/170	263/269
	CS17-12	110/110	208/220	161/167	210/210	196/196	181/185	164/173	263/269
	CS17-13	104/110	220/223	164/173	210/210	188/188	173/173	167/173	263/263
	CS17-14	110/110	220/223	164/173	210/210	196/196	185/189	167/170	263/263
	CS17-15	104/110	208/223	161/167	210/210	196/196	173/185	167/170	263/269
	CS17-16	110/110	220/223	161/173	210/210	196/196	173/185	167/170	263/269
	CS17-17	104/110	208/220	161/167	210/210	192/192	173/173	164/170	263/263
	CS17-18	104/110	208/223	161/173	210/210	188/188	173/185	164/173	263/263
	CS17-19	110/110	223/223	161/173	210/210	192/192	173/173	167/173	263/269
	CS17-20	110/110	208/223	161/167	210/210	188/188	173/173	164/170	263/263
	CS17-21	110/110	223/223	164/167	210/210	192/192	185/189	167/170	263/269
	CS17-22	104/110	208/223	164/173	210/210	196/196	185/189	164/173	263/269
	CS17-23	104/110	208/220	164/167	210/210	188/188	173/189	167/170	263/263
	CS17-24	104/110	208/220	161/173	210/210	188/192	173/189	167/170	263/263
	CS17-25	110/110	208/220	161/173	210/210	188/188	185/189	167/170	263/269
CS18	CS18-1	110/110	223/235	167/173	210/210	192/192	169/173	164/170	263/263
	CS18-2	101/110	223/235	167/179	210/210	192/192	173/177	164/167	263/275
	CS18-3	101/101	208/235	167/179	210/210	192/192	169/173	164/167	263/263
	CS18-4	110/110	223/235	173/176	210/215	192/192	173/177	167/170	275/281
	CS18-5	101/110	208/235	176/179	210/210	192/192	169/177	164/170	263/275
	CS18-6	101/110	214/223	167/173	210/210	192/192	173/173	170/170	275/281
	CS18-7	101/110	223/235	167/179	210/210	192/192	173/173	164/167	263/275
	CS18-8	101/101	223/235	167/173	210/210	192/192	173/177	167/170	263/281
	CS18-9	101/110	208/235	176/179	210/210	192/192	169/177	167/170	263/281
	CS18-10	101/110	208/214	167/179	210/210	192/192	173/177	164/167	263/275
	CS18-11	110/110	208/214	167/173	210/210	192/192	169/177	167/170	275/281
	CS18-12	101/110	223/235	167/179	210/210	192/192	173/173	167/170	275/281
	CS18-13	101/101	223/235	176/179	210/210	192/192	173/177	170/170	275/281
	CS18-14	110/110	208/214	176/179	210/210	192/192	173/173	170/170	263/281
	CS18-15	101/110	223/235	167/179	210/215	192/192	173/173	170/170	263/281
	CS18-16	110/110	208/235	167/173	210/215	192/192	169/177	170/170	275/281
	CS18-17	110/110	208/235	176/179	210/210	192/192	173/173	167/170	275/281
	CS18-18	101/110	214/223	167/179	210/210	192/192	169/173	170/170	263/281
	CS18-19	101/110	208/214	173/176	210/215	192/192	173/177	164/170	263/275
	CS18-20	110/110	223/235	173/176	210/210	192/192	169/177	164/167	263/263
	CS18-21	101/110	223/235	167/179	210/210	192/192	173/177	167/170	275/281
	CS18-22	101/110	223/235	167/173	210/210	192/192	173/177	167/170	263/281
	CS18-23	101/110	214/223	176/179	210/210	192/192	173/177	167/170	275/281
	CS18-24	110/110	208/235	167/173	210/210	192/192	173/173	164/167	263/275
	CS18-25	101/110	208/235	173/176	210/210	192/192	169/173	167/170	263/275
CS19	CS19-1	101/110	214/226	167/185	210/210	192/192	173/189	164/164	263/263
	CS19-2	110/110	214/226	164/164	210/210	192/192	173/189	164/164	263/263
	CS19-3	101/107	214/226	164/185	210/210	192/192	177/189	164/170	263/263
	CS19-4	107/107	223/226	167/185	210/210	192/192	173/189	164/164	263/263
	CS19-5	101/110	214/223	164/164	210/215	192/192	173/177	164/164	263/263
	CS19-6	101/107	214/223	164/185	210/210	192/192	173/189	164/170	263/263
	CS19-7	101/110	214/223	164/167	210/210	192/192	173/177	164/164	263/263
	CS19-8	110/110	214/223	na	210/210	192/192	173/173	164/164	263/263
	CS19-9	101/110	214/223	164/167	210/210	188/192	173/189	164/170	263/263
	CS19-10	101/107	214/223	164/164	210/210	192/192	173/189	164/164	263/263
	CS19-11	110/110	214/226	164/185	210/210	192/192	177/189	164/170	263/263
	CS19-12	110/110	223/226	164/167	210/210	188/192	177/189	164/170	263/263
	CS19-13	101/110	214/223	164/164	210/210	188/188	177/189	164/164	263/263
	CS19-14	107/107	226/226	167/185	210/210	188/192	173/189	164/170	263/263
	CS19-15	101/107	226/226	164/185	210/210	192/192	173/173	164/164	263/263
	CS19-16	110/110	214/223	164/164	210/215	192/192	173/173	164/170	263/263
	CS19-17	101/110	214/226	164/185	210/210	188/188	173/173	164/170	263/263
	CS19-18	110/110	226/226	164/167	210/210	192/192	173/173	164/164	263/263
	CS19-19	107/107	214/223	164/164	210/210	192/192	173/173	164/164	263/263
	CS19-20	110/110	214/226	164/164	210/210	192/192	173/173	164/164	263/263
	CS19-21	101/107	226/226	164/167	210/210	192/192	173/177	164/170	263/263
	CS19-22	110/110	223/226	164/164	210/210	192/192	173/177	164/164	263/263
	CS19-23	107/107	226/226	164/167	210/210	192/192	177/189	164/164	263/263
	CS19-24	101/107	226/226	164/185	210/210	188/188	173/189	164/170	263/263
	CS19-25	101/107	214/226	164/167	210/210	192/192	177/189	164/164	263/263
CS20	CS20-1	101/110	214/247	170/170	210/215	204/204	173/181	164/164	263/275
	CS20-2	107/110	214/235	170/179	210/210	204/204	173/181	164/164	263/263
	CS20-3	101/110	214/235	170/179	210/215	204/204	173/181	164/164	263/263
	CS20-4	104/107	214/235	170/179	210/210	184/184	181/189	164/164	263/275
	CS20-5	107/110	214/247	170/179	210/215	184/184	181/181	164/164	263/275
	CS20-6	107/110	214/247	170/170	210/215	204/204	173/181	164/164	263/275
	CS20-7	101/110	214/247	170/179	210/215	204/204	173/189	164/164	263/275
	CS20-8	101/104	214/247	170/170	210/215	184/184	181/189	164/164	263/263
	CS20-9	101/104	214/247	170/170	210/210	204/204	181/181	164/164	263/263
	CS20-10	104/107	214/235	170/170	210/215	184/184	181/189	164/164	263/275
	CS20-11	104/107	214/235	170/179	210/210	204/204	181/181	164/164	263/263
	CS20-12	104/107	214/247	170/179	210/215	204/204	173/189	164/164	263/263
	CS20-13	107/110	214/247	170/179	215/215	184/184	181/189	164/164	263/263
	CS20-14	107/110	214/247	170/170	210/210	204/204	181/181	164/164	263/275
	CS20-15	101/104	214/247	170/170	210/210	184/184	181/189	164/164	263/275
	CS20-16	104/107	214/247	170/170	215/215	204/204	173/181	164/164	263/275
	CS20-17	101/110	214/247	170/170	210/215	204/204	173/181	164/164	263/275
	CS20-18	101/104	214/235	170/170	210/215	204/204	173/189	164/164	263/263
	CS20-19	104/107	214/247	170/179	210/210	204/204	181/181	164/164	263/263
	CS20-20	101/104	214/247	170/179	210/210	180/180	173/189	164/164	263/263
	CS20-21	101/110	214/247	170/179	210/210	184/184	181/181	164/164	263/263
	CS20-22	101/110	214/247	170/179	210/215	204/204	181/181	164/164	263/275
	CS20-23	107/110	214/247	170/179	210/215	184/184	173/181	164/164	263/275
	CS20-24	107/110	214/247	170/179	210/215	184/184	173/181	164/164	263/275
	CS20-25	101/104	214/247	170/179	210/215	204/204	181/189	164/164	263/275
CS21	CS21-1	107/110	205/205	164/164	210/210	188/188	173/173	164/170	263/275
	CS21-2	107/110	205/205	164/176	210/210	188/188	173/181	164/173	275/275
	CS21-3	107/110	214/232	164/176	210/210	188/188	173/173	164/173	263/263
	CS21-4	101/110	214/232	164/173	210/210	180/188	173/173	164/173	263/263
	CS21-5	101/110	205/232	173/176	210/210	188/188	173/181	164/170	275/275
	CS21-6	101/110	205/232	173/176	210/210	188/188	173/173	164/173	263/275
	CS21-7	101/110	214/232	173/176	210/210	188/188	173/181	164/170	263/275
	CS21-8	104/107	205/214	173/176	210/210	188/188	173/173	164/173	263/275
	CS21-9	104/107	205/205	164/176	210/210	188/188	173/173	164/173	275/275
	CS21-10	107/110	205/232	164/164	210/210	188/188	173/173	164/170	263/275
	CS21-11	101/110	214/232	164/164	210/210	188/188	173/173	164/170	263/263
	CS21-12	101/110	205/205	164/164	210/210	192/192	173/173	164/173	263/275
	CS21-13	104/107	214/232	164/173	210/210	192/192	173/181	164/173	263/275
	CS21-14	101/110	214/232	173/176	210/210	188/188	173/173	164/173	275/275
	CS21-15	101/110	205/214	164/176	210/210	192/192	173/173	164/173	263/263
	CS21-16	101/104	205/232	164/164	210/210	188/188	173/173	164/173	263/275
	CS21-17	101/110	205/214	164/176	210/210	188/188	173/173	164/173	275/275
	CS21-18	104/107	214/232	164/164	210/210	188/188	173/173	164/170	263/263
	CS21-19	101/110	205/214	173/176	210/210	188/188	173/173	164/173	263/275
	CS21-20	104/107	205/205	164/173	210/210	188/188	173/181	164/173	275/275
	CS21-21	101/110	205/214	164/164	210/210	188/188	173/181	164/173	263/275
	CS21-22	101/104	205/205	164/176	210/210	188/192	173/181	164/173	263/263
	CS21-23	104/107	205/232	164/173	210/210	188/192	173/173	164/170	263/263
	CS21-24	101/110	205/214	173/176	210/210	188/188	173/173	164/170	263/275
	CS21-25	101/110	214/232	164/176	210/210	188/188	173/173	164/170	263/275
CS22	CS22-1	104/107	214/223	170/173	210/210	204/204	177/189	164/170	263/263
	CS22-2	107/107	214/223	170/173	210/210	204/204	177/181	164/164	269/269
	CS22-3	na	223/223	na	210/210	na	181/181	na	263/263
	CS22-4	104/110	205/214	170/173	210/210	188/192	177/181	164/164	263/269
	CS22-5	107/107	205/214	170/173	210/210	188/204	177/181	164/170	263/263
	CS22-6	107/107	205/205	170/179	210/210	188/192	181/189	164/164	263/269
	CS22-7	104/110	214/223	170/179	210/215	188/188	177/189	164/170	263/263
	CS22-8	104/110	205/205	170/179	210/215	204/204	181/181	164/170	263/263
	CS22-9	104/107	208/208	170/179	210/215	204/204	177/189	164/170	263/263
	CS22-10	107/107	214/223	170/179	210/210	188/204	181/181	164/170	263/263
	CS22-11	104/107	223/223	170/179	210/215	204/204	181/189	164/170	263/263
	CS22-12	107/107	205/205	170/173	210/210	188/188	181/181	164/164	263/269
	CS22-13	104/110	205/205	170/179	210/215	188/204	181/181	164/164	263/269
	CS22-14	104/107	214/223	170/179	210/210	188/204	177/181	164/164	263/269
	CS22-15	104/110	205/205	170/173	210/215	188/188	181/181	164/170	263/263
	CS22-16	104/107	223/223	170/173	210/215	204/204	181/189	164/170	263/263
	CS22-17	104/107	214/223	170/173	210/210	188/188	181/181	164/170	263/263
	CS22-18	107/110	205/205	170/173	210/215	188/188	177/181	164/164	263/269
	CS22-19	104/107	214/223	170/173	210/210	188/188	177/181	164/170	263/263
	CS22-20	104/107	205/205	170/173	210/210	188/188	177/189	164/164	263/269
	CS22-21	107/107	205/214	170/179	210/215	188/204	181/189	164/170	263/263
	CS22-22	107/110	205/214	170/179	210/215	188/204	181/181	164/164	263/269
	CS22-23	107/107	205/214	170/179	210/210	188/192	181/181	164/164	263/269
	CS22-24	104/107	223/223	170/173	210/215	188/188	177/189	164/164	263/269
	CS22-25	104/110	205/205	170/173	215/215	188/188	177/181	164/164	263/269
CS23	CS23-1	110/110	223/226	173/176	210/210	188/192	173/181	140/167	263/269
	CS23-2	110/110	223/226	173/176	210/215	192/192	173/173	164/167	269/281
	CS23-3	110/110	223/226	167/173	210/210	188/192	173/181	164/167	269/281
	CS23-4	110/110	223/226	173/176	210/210	188/192	173/181	164/167	269/281
	CS23-5	101/110	223/226	173/176	215/215	188/192	173/173	140/167	269/281
	CS23-6	101/110	223/226	173/176	210/210	188/188	173/181	140/167	263/269
	CS23-7	110/110	223/226	167/173	210/215	188/188	173/173	140/167	263/269
	CS23-8	110/110	223/226	167/173	210/215	192/192	173/173	164/167	263/269
	CS23-9	110/110	223/226	173/176	210/215	188/192	173/181	164/167	263/269
	CS23-10	101/110	214/226	173/176	210/215	188/192	173/173	140/167	269/281
	CS23-11	101/110	223/226	167/173	210/210	192/192	173/181	140/167	263/269
	CS23-12	110/110	223/226	173/176	215/215	192/192	173/181	140/167	269/281
	CS23-13	101/110	223/226	167/173	210/215	192/192	173/181	140/167	269/281
	CS23-14	110/110	223/226	173/176	210/210	192/192	173/181	140/167	269/281
	CS23-15	101/110	223/226	167/173	210/215	188/192	173/181	164/167	263/269
	CS23-16	101/110	223/226	173/176	210/215	192/192	173/173	140/167	269/281
	CS23-17	110/110	223/226	167/173	210/215	192/192	173/173	140/167	269/281
	CS23-18	110/110	223/226	173/176	210/210	192/192	173/181	140/167	269/281
	CS23-19	101/110	223/226	173/176	210/215	188/192	173/181	164/167	263/269
	CS23-20	101/110	223/226	167/173	210/215	192/192	173/173	164/167	263/269
	CS23-21	101/110	223/226	167/173	210/215	188/192	173/173	164/167	263/269
	CS23-22	110/110	223/226	173/176	210/210	192/192	173/173	140/167	269/281
	CS23-23	110/110	223/226	173/176	215/215	188/192	173/181	164/167	263/269
	CS23-24	101/110	223/226	173/176	215/215	192/192	173/173	140/167	263/269
	CS23-25	101/110	223/226	173/176	215/215	188/192	173/173	140/167	269/281
CS24	CS24-1	110/110	223/226	167/173	210/210	192/192	173/181	140/167	269/281
	CS24-2	110/110	223/226	167/173	210/210	192/192	173/173	164/167	263/269
	CS24-3	101/110	223/226	173/176	210/210	188/192	173/173	164/167	263/269
	CS24-4	110/110	223/226	173/176	215/215	188/192	173/181	164/167	269/281
	CS24-5	110/110	223/226	173/176	210/215	192/192	173/173	140/167	269/281
	CS24-6	101/110	223/226	167/173	210/215	192/192	173/181	140/167	263/269
	CS24-7	110/110	223/226	167/173	210/215	192/192	173/181	140/167	269/281
	CS24-8	101/110	223/226	173/176	210/210	188/188	173/181	140/167	263/269
	CS24-9	110/110	223/226	167/173	210/215	192/192	173/173	164/167	263/269
	CS24-10	101/110	223/226	173/176	210/215	192/192	173/181	164/167	263/269
	CS24-11	101/110	223/226	173/176	210/215	192/192	173/181	164/167	269/281
	CS24-12	110/110	223/226	173/176	210/210	192/192	173/173	140/167	269/281
	CS24-13	101/110	223/226	167/173	210/215	192/192	173/181	140/167	269/281
	CS24-14	110/110	214/226	173/176	210/215	188/188	173/181	164/167	269/281
	CS24-15	101/110	214/226	173/176	210/215	192/192	173/181	140/167	269/281
	CS24-16	101/110	223/226	173/176	210/210	188/188	173/181	164/167	263/269
	CS24-17	110/110	223/226	167/173	207/210	188/188	173/181	140/167	269/281
	CS24-18	101/110	223/226	167/173	207/210	192/192	173/181	164/167	269/281
	CS24-19	110/110	223/226	173/176	207/210	192/192	173/173	164/167	263/269
	CS24-20	101/110	223/226	167/173	210/215	192/192	173/181	164/167	269/281
	CS24-21	110/110	223/226	167/173	210/215	192/192	173/173	140/167	263/269
	CS24-22	128/128	223/226	167/173	207/210	188/188	173/173	140/167	269/281
	CS24-23	101/110	223/226	173/176	210/215	192/192	173/173	164/167	263/269
	CS24-24	101/110	223/226	167/173	207/210	188/188	173/181	140/167	269/281
	CS24-25	101/110	223/226	173/176	207/210	192/192	173/173	140/167	269/281
CS25	CS25-1	107/143	208/208	161/176	207/210	184/184	181/189	164/170	263/269
	CS25-2	107/143	208/208	176/179	207/210	184/184	173/181	164/164	263/269
	CS25-3	104/137	226/241	161/170	207/210	196/196	173/197	164/170	275/275
	CS25-4	107/143	223/223	161/170	207/210	192/196	173/197	164/164	275/275
	CS25-5	104/137	199/208	176/179	210/210	188/188	173/181	164/164	263/269
	CS25-6	104/137	217/223	161/173	210/210	196/196	173/181	164/170	275/275
	CS25-7	104/107	208/208	173/179	210/210	180/188	181/189	164/170	263/269
	CS25-8	104/137	220/220	176/179	210/210	180/188	181/189	170/170	263/269
	CS25-9	104/137	223/223	161/173	210/210	196/196	173/181	164/164	275/275
	CS25-10	104/107	223/226	161/173	210/210	196/196	173/197	164/164	263/275
	CS25-11	107/137	226/241	161/173	210/210	204/204	185/197	164/164	263/275
	CS25-12	104/137	223/226	161/170	210/210	204/204	185/197	164/170	263/269
	CS25-13	104/137	217/223	170/170	210/210	192/192	173/197	164/164	263/275
	CS25-14	104/107	223/241	170/170	210/210	204/204	173/181	164/170	263/275
	CS25-15	104/107	208/208	161/176	210/210	180/188	173/181	164/170	263/269
	CS25-16	137/143	223/241	161/170	210/210	192/196	185/197	164/164	263/275
	CS25-17	104/137	208/208	161/176	207/210	180/188	173/181	170/170	263/269
	CS25-18	137/143	220/220	176/179	210/210	188/188	181/189	164/164	263/269
	CS25-19	104/107	223/226	161/173	210/210	204/204	185/197	164/170	263/275
	CS25-20	104/137	199/220	161/176	210/210	184/184	181/189	170/170	263/269
	CS25-21	104/107	226/241	170/170	210/210	196/196	173/181	164/164	263/263
	CS25-22	101/104	201/208	176/179	210/210	180/184	181/189	164/170	263/269
	CS25-23	101/137	199/208	176/179	210/210	180/188	181/189	164/170	263/269
	CS25-24	101/137	226/241	170/170	207/210	192/196	181/185	164/164	263/263
	CS25-25	101/107	220/220	161/176	207/210	184/184	185/189	164/170	263/269

## Sheet: SSR data for Chongqing (CQ)
Sample	Individual	Rf24-2	Rf21-1	Rf6-1	Rf1-3	RS78	RS68	RS10	RS15
CQ1	CQ1-1	107/107	226/244	167/176	210/212	192/200	173/181	164/170	275/281
	CQ1-2	137/137	205/226	170/176	215/215	188/192	169/185	170/170	275/281
	CQ1-3	107/107	205/226	167/176	210/212	192/192	181/185	170/170	275/281
	CQ1-4	137/137	211/244	167/176	210/212	192/200	181/185	164/170	275/281
	CQ1-5	137/137	205/211	167/176	210/215	188/192	173/181	164/170	na
	CQ1-6	107/107	211/244	170/176	215/215	188/192	169/173	164/170	281/287
	CQ1-7	137/137	205/226	167/176	212/212	188/192	169/173	164/164	281/287
	CQ1-8	107/107	211/244	167/176	210/212	192/200	169/185	164/164	281/287
	CQ1-9	107/107	205/226	167/176	210/212	188/200	173/181	164/170	275/287
	CQ1-10	137/137	205/226	170/176	210/212	192/192	169/173	164/170	275/281
	CQ1-11	137/137	211/244	170/176	215/215	192/192	181/185	170/170	275/281
	CQ1-12	107/107	205/226	170/176	212/224	192/192	169/185	170/170	275/275
	CQ1-13	107/107	205/211	167/176	210/210	188/200	181/185	164/164	281/287
	CQ1-14	107/107	226/244	na	215/215	188/192	173/181	164/170	275/287
	CQ1-15	137/137	205/211	167/176	210/215	188/200	181/185	164/170	275/281
	CQ1-16	137/137	211/244	170/176	210/212	192/200	169/173	164/170	275/287
	CQ1-17	107/107	205/226	170/176	210/215	192/192	181/185	164/170	275/281
	CQ1-18	137/137	226/244	167/176	212/212	192/200	169/173	164/170	275/281
	CQ1-19	107/107	226/244	170/176	210/215	188/200	169/185	164/164	281/287
	CQ1-20	107/137	205/226	167/176	212/224	192/200	181/185	164/170	281/287
	CQ1-21	107/137	211/244	170/176	210/215	188/192	169/173	170/170	275/281
	CQ1-22	137/137	205/211	167/176	212/212	192/192	181/185	164/170	275/275
	CQ1-23	107/107	211/244	170/176	212/224	188/200	169/173	164/164	281/287
	CQ1-24	137/137	226/244	170/176	210/215	188/192	181/185	164/170	275/287
	CQ1-25	137/137	205/211	170/176	212/212	188/192	173/181	170/170	275/275
CQ2	CQ2-1	95/107	205/226	167/176	215/215	188/192	173/185	170/170	275/284
	CQ2-2	95/107	226/229	167/176	210/215	188/192	173/177	164/164	263/263
	CQ2-3	104/107	226/229	167/176	210/210	188/192	173/177	164/170	263/284
	CQ2-4	104/104	205/238	167/176	215/215	192/196	173/177	164/164	263/275
	CQ2-5	95/104	226/229	176/176	210/215	192/196	173/185	170/170	263/284
	CQ2-6	104/104	205/226	167/176	210/215	188/192	173/177	164/170	263/263
	CQ2-7	95/107	229/238	176/176	215/215	188/192	173/185	164/170	275/284
	CQ2-8	104/107	226/229	167/176	215/215	188/192	173/185	164/164	263/275
	CQ2-9	95/107	226/229	167/167	215/215	192/196	173/177	164/164	263/263
	CQ2-10	104/104	205/238	176/176	210/210	192/196	173/177	164/170	275/284
	CQ2-11	95/104	205/226	167/176	215/215	188/192	173/185	164/164	263/263
	CQ2-12	95/104	205/238	167/167	215/215	192/196	173/177	164/170	263/284
	CQ2-13	95/104	205/226	176/176	210/215	192/196	173/177	164/164	263/263
	CQ2-14	104/104	205/226	176/176	215/215	192/196	173/177	164/170	263/263
	CQ2-15	104/107	229/238	167/176	215/215	188/192	173/185	164/170	275/284
	CQ2-16	95/104	205/238	167/167	215/215	192/196	173/185	170/170	263/284
	CQ2-17	95/107	229/238	167/176	215/215	188/192	173/185	170/170	263/284
	CQ2-18	95/107	226/229	167/176	215/215	188/192	173/185	170/170	275/284
	CQ2-19	95/104	205/238	167/176	215/215	192/196	173/177	164/164	263/275
	CQ2-20	95/107	205/226	167/167	215/215	192/196	173/185	164/164	263/275
	CQ2-21	95/107	205/226	167/167	215/215	192/196	173/177	164/164	263/263
	CQ2-22	104/107	205/238	167/176	215/215	192/196	173/177	164/170	263/284
	CQ2-23	95/107	205/226	167/176	215/215	188/192	173/177	170/170	263/284
	CQ2-24	95/104	226/229	167/176	215/215	192/196	173/185	164/170	275/284
	CQ2-25	95/107	205/226	167/176	215/215	188/192	173/185	164/164	263/275
CQ3	CQ3-1	95/104	223/226	176/182	215/215	184/192	177/193	164/164	263/275
	CQ3-2	104/107	202/208	176/176	215/215	188/192	177/193	164/164	266/275
	CQ3-3	101/104	202/208	170/185	215/215	188/192	181/197	164/164	266/287
	CQ3-4	101/107	202/208	161/176	215/215	188/188	173/197	164/164	266/287
	CQ3-5	95/104	208/226	176/182	210/215	192/192	173/185	164/170	263/275
	CQ3-6	104/107	202/223	176/182	210/215	184/188	177/193	164/164	266/275
	CQ3-7	101/107	202/208	161/185	215/215	188/192	181/197	164/164	275/287
	CQ3-8	101/104	208/208	170/185	215/215	188/188	173/181	164/164	275/275
	CQ3-9	101/107	202/208	161/185	215/215	188/192	181/197	164/164	275/287
	CQ3-10	95/104	223/226	176/182	215/215	192/192	173/193	164/164	263/275
	CQ3-11	101/107	202/208	161/185	215/227	188/188	173/197	164/164	266/272
	CQ3-12	101/107	202/208	170/185	215/215	188/192	173/197	164/164	272/275
	CQ3-13	101/104	202/208	170/185	215/227	188/192	181/197	164/164	272/275
	CQ3-14	101/107	202/208	161/185	215/215	188/192	173/181	164/164	266/287
	CQ3-15	95/104	208/226	176/179	215/215	184/188	173/185	164/164	263/287
	CQ3-16	95/104	223/226	176/176	215/215	192/192	177/193	164/170	263/275
	CQ3-17	95/104	202/208	176/182	215/215	184/188	177/193	164/164	266/275
	CQ3-18	95/104	202/223	176/182	210/215	184/192	173/193	164/170	263/287
	CQ3-19	101/104	202/208	161/176	215/227	188/188	173/181	164/164	272/275
	CQ3-20	104/107	223/226	176/179	215/215	184/188	173/185	164/170	263/287
	CQ3-21	95/104	202/223	176/179	215/215	184/188	177/185	164/164	266/275
	CQ3-22	95/104	223/226	176/179	215/215	192/192	177/185	164/164	266/287
	CQ3-23	95/104	202/223	176/179	215/215	192/192	177/193	164/164	266/287
	CQ3-24	104/107	208/226	176/179	215/215	188/192	173/185	164/170	263/275
	CQ3-25	101/104	202/208	161/176	215/215	188/192	177/181	164/164	266/272
CQ4	CQ4-1	107/119	211/214	167/176	224/224	184/196	173/185	164/170	263/266
	CQ4-2	107/119	214/220	167/170	215/215	196/200	173/189	164/170	263/266
	CQ4-3	98/119	214/220	176/191	215/215	184/188	173/185	164/170	266/269
	CQ4-4	104/107	211/223	176/191	215/215	184/196	173/189	164/170	266/269
	CQ4-5	98/104	220/223	167/176	215/215	200/200	173/189	164/164	263/266
	CQ4-6	104/107	211/223	176/191	215/215	200/200	173/185	164/164	263/266
	CQ4-7	107/119	211/214	167/176	215/215	184/188	173/189	164/164	266/269
	CQ4-8	98/119	211/214	167/176	215/215	196/200	173/189	164/164	263/266
	CQ4-9	107/119	211/214	176/191	215/215	184/196	173/185	164/164	266/269
	CQ4-10	98/119	214/220	167/176	224/224	200/200	173/189	164/164	263/266
	CQ4-11	107/119	220/223	167/176	215/215	184/196	173/189	164/170	263/266
	CQ4-12	104/107	211/214	167/176	215/215	196/200	173/185	164/164	263/266
	CQ4-13	107/119	220/223	167/170	215/215	196/200	173/185	164/164	266/269
	CQ4-14	98/119	211/223	167/176	215/215	184/188	173/185	164/170	266/269
	CQ4-15	98/119	211/223	167/176	224/224	196/200	173/185	164/170	266/269
	CQ4-16	104/107	211/223	167/170	215/215	184/188	173/189	164/170	266/269
	CQ4-17	107/119	211/214	167/176	215/224	196/200	173/185	164/170	266/269
	CQ4-18	107/119	211/223	167/170	215/224	184/196	173/189	164/170	263/266
	CQ4-19	98/119	211/223	167/176	215/215	196/200	173/185	164/170	263/266
	CQ4-20	107/119	211/214	170/191	215/215	184/196	173/185	164/170	263/266
	CQ4-21	98/104	211/214	167/170	215/215	196/200	173/189	164/170	263/266
	CQ4-22	98/119	211/214	176/191	215/215	196/200	173/189	164/170	263/266
	CQ4-23	98/119	211/214	176/191	215/215	184/188	173/189	164/164	266/269
	CQ4-24	104/107	220/223	170/191	224/224	184/196	173/185	164/170	266/269
	CQ4-25	98/104	214/220	170/191	215/215	196/200	173/185	164/170	266/269
CQ5	CQ5-1	110/119	205/226	167/176	215/227	200/200	173/173	170/176	263/281
	CQ5-2	110/119	220/226	170/191	215/215	188/192	173/173	170/170	275/281
	CQ5-3	107/110	205/226	170/176	215/215	188/192	173/197	170/176	263/275
	CQ5-4	107/110	205/205	170/176	215/227	200/200	173/197	170/170	263/263
	CQ5-5	107/110	205/220	167/176	227/227	188/192	173/173	170/170	275/281
	CQ5-6	107/119	220/226	170/191	215/215	200/200	173/197	170/176	263/263
	CQ5-7	107/110	205/205	170/191	215/227	192/192	173/197	170/170	275/281
	CQ5-8	107/119	205/205	167/191	227/227	192/192	173/173	170/176	275/281
	CQ5-9	110/119	220/226	170/191	227/227	192/192	173/197	170/176	263/281
	CQ5-10	107/119	220/226	167/176	215/227	192/192	173/173	170/170	263/263
	CQ5-11	107/107	205/220	167/191	215/215	200/200	173/197	170/176	263/275
	CQ5-12	107/107	205/226	167/191	215/215	192/192	173/197	170/170	263/281
	CQ5-13	107/107	205/220	167/191	215/215	192/192	173/173	170/176	263/263
	CQ5-14	107/107	205/220	167/191	227/227	200/200	173/173	170/170	263/263
	CQ5-15	107/119	220/226	167/191	215/215	200/200	173/197	170/176	263/275
	CQ5-16	107/110	205/220	170/176	215/227	200/200	173/197	170/170	263/281
	CQ5-17	107/107	205/226	167/191	215/227	200/200	173/173	170/170	275/281
	CQ5-18	107/110	205/220	170/191	227/227	200/200	173/197	170/176	263/281
	CQ5-19	107/107	220/226	170/176	215/227	200/200	173/173	170/176	263/263
	CQ5-20	107/110	205/226	170/176	215/227	188/192	173/197	170/176	263/275
	CQ5-21	107/119	205/226	167/176	215/215	188/192	173/197	170/170	275/281
	CQ5-22	107/107	205/226	167/191	215/215	200/200	173/197	170/176	263/263
	CQ5-23	110/119	205/226	167/176	215/215	200/200	173/173	170/170	275/281
	CQ5-24	107/119	205/226	170/191	215/215	200/200	173/197	170/176	263/275
	CQ5-25	107/110	205/220	170/191	215/215	200/200	173/173	170/176	263/263
CQ6	CQ6-1	101/104	205/223	176/176	212/215	188/204	185/185	164/170	284/284
	CQ6-2	101/101	211/223	176/176	212/215	192/192	173/189	164/170	263/287
	CQ6-3	104/104	205/223	173/176	215/215	188/204	173/177	164/170	263/284
	CQ6-4	101/104	211/223	173/176	212/215	188/192	185/185	164/170	284/284
	CQ6-5	101/107	211/223	170/173	212/215	188/204	173/189	164/170	284/284
	CQ6-6	104/107	205/223	176/176	212/215	188/192	185/185	164/170	263/287
	CQ6-7	101/101	205/223	170/173	212/215	192/192	185/185	164/170	284/284
	CQ6-8	101/104	205/223	173/176	212/215	188/204	185/185	164/170	284/287
	CQ6-9	101/104	211/223	176/176	212/215	188/204	173/189	164/170	284/284
	CQ6-10	101/104	205/226	173/176	212/215	188/192	173/185	164/170	263/287
	CQ6-11	101/107	205/226	170/173	212/215	188/192	185/185	164/170	284/284
	CQ6-12	104/107	205/226	170/173	212/215	192/204	185/185	164/170	284/287
	CQ6-13	101/104	205/226	170/173	212/215	188/204	185/189	164/170	263/287
	CQ6-14	101/104	205/226	173/176	215/215	192/192	185/185	164/170	263/284
	CQ6-15	101/101	205/226	170/173	215/215	192/204	185/189	164/170	284/287
	CQ6-16	101/104	205/226	173/176	212/215	188/204	185/189	164/170	263/287
	CQ6-17	101/101	211/223	170/176	212/215	192/204	185/189	164/170	284/284
	CQ6-18	101/104	211/226	176/176	212/215	188/204	173/189	164/170	284/287
	CQ6-19	104/107	205/223	176/176	212/215	192/192	185/185	164/170	263/284
	CQ6-20	101/101	205/226	170/173	212/215	188/192	173/189	164/170	263/287
	CQ6-21	101/104	205/226	170/173	212/215	188/204	185/185	164/170	284/284
	CQ6-22	101/101	211/223	176/176	212/215	192/192	173/185	164/170	284/284
	CQ6-23	101/104	211/223	170/173	212/215	192/192	185/189	164/170	284/287
	CQ6-24	101/101	205/223	176/176	212/215	192/204	185/185	164/170	263/284
	CQ6-25	101/107	211/223	170/176	212/215	192/192	173/185	164/170	263/284
CQ7	CQ7-1	101/107	205/226	170/182	215/215	188/188	185/205	164/164	263/263
	CQ7-2	101/107	205/226	170/173	215/215	192/192	181/185	164/164	275/281
	CQ7-3	101/107	205/226	170/173	215/215	188/192	181/205	164/164	275/275
	CQ7-4	101/107	205/226	173/176	215/215	192/192	181/205	164/164	275/281
	CQ7-5	101/107	205/226	170/173	210/215	188/192	181/185	164/164	263/263
	CQ7-6	101/107	205/226	176/182	215/215	192/192	185/205	164/164	263/281
	CQ7-7	101/107	205/226	176/182	215/215	188/192	181/181	164/164	275/275
	CQ7-8	101/107	205/226	176/182	215/215	192/192	185/205	164/164	263/281
	CQ7-9	101/107	205/226	170/173	215/215	192/192	181/181	164/164	263/263
	CQ7-10	101/107	205/226	176/182	215/215	188/192	181/181	164/164	263/281
	CQ7-11	101/107	205/226	173/176	215/215	188/188	185/205	164/164	263/281
	CQ7-12	101/107	205/226	170/182	215/215	188/188	181/185	164/164	275/281
	CQ7-13	101/107	205/226	176/182	210/210	188/192	181/185	164/164	275/281
	CQ7-14	101/107	205/226	170/182	215/215	188/192	185/205	164/164	275/275
	CQ7-15	101/107	205/226	170/173	210/210	188/192	181/181	164/164	275/281
	CQ7-16	101/107	205/226	170/173	215/215	188/192	181/181	164/164	263/281
	CQ7-17	101/107	205/226	176/182	215/215	188/192	185/205	164/164	275/281
	CQ7-18	101/107	205/226	173/176	215/215	188/192	181/181	164/164	275/275
	CQ7-19	101/107	205/226	176/182	215/215	188/192	181/205	164/164	275/281
	CQ7-20	101/107	205/226	176/182	215/215	192/192	185/205	164/164	263/281
	CQ7-21	101/107	205/226	173/176	215/215	192/192	181/185	164/164	263/263
	CQ7-22	101/107	205/226	173/176	215/215	192/192	181/205	164/164	263/281
	CQ7-23	101/107	205/226	170/182	215/215	188/192	181/181	164/164	263/263
	CQ7-24	101/107	205/226	176/182	215/215	188/192	185/205	164/164	263/263
	CQ7-25	101/107	205/226	173/176	215/215	188/192	181/185	164/164	263/263
CQ8	CQ8-1	95/107	205/226	173/176	215/215	184/188	173/177	170/170	275/275
	CQ8-2	95/107	205/226	182/182	210/215	192/192	173/177	164/170	263/275
	CQ8-3	101/104	226/229	161/167	210/215	188/192	173/177	170/170	263/275
	CQ8-4	95/107	220/229	170/176	215/215	188/196	177/189	164/164	263/287
	CQ8-5	101/119	205/226	170/185	215/224	188/188	173/189	164/164	263/263
	CQ8-6	95/107	205/220	170/176	215/224	188/188	173/173	164/164	263/263
	CQ8-7	107/119	220/229	170/176	215/224	192/196	173/189	164/170	263/272
	CQ8-8	95/107	226/229	173/176	210/215	184/188	177/193	164/170	275/275
	CQ8-9	101/119	205/226	170/176	215/215	188/192	173/173	164/164	263/263
	CQ8-10	104/107	226/229	161/173	215/224	184/192	177/185	164/170	275/275
	CQ8-11	107/119	205/226	170/185	215/224	192/196	173/173	164/170	263/272
	CQ8-12	101/110	205/220	170/185	215/215	188/192	173/173	164/170	263/263
	CQ8-13	95/101	226/229	173/176	210/215	184/188	173/193	164/170	263/275
	CQ8-14	107/119	220/229	170/185	215/224	188/188	173/189	164/164	263/287
	CQ8-15	95/107	205/220	170/185	224/224	192/196	173/189	164/164	263/287
	CQ8-16	95/107	220/229	170/185	215/224	188/188	177/189	164/164	263/263
	CQ8-17	107/119	205/220	170/176	215/215	188/192	173/177	164/170	263/272
	CQ8-18	95/107	220/229	170/185	215/224	188/196	173/189	164/170	263/272
	CQ8-19	95/101	220/229	170/185	215/224	192/196	177/189	164/170	263/272
	CQ8-20	95/107	205/220	170/176	215/224	188/188	173/189	164/164	263/287
	CQ8-21	104/107	226/229	179/182	215/224	184/188	173/177	164/170	275/275
	CQ8-22	101/119	205/220	170/176	215/224	188/196	173/189	164/164	263/263
	CQ8-23	95/101	226/229	173/176	215/224	184/192	177/193	170/170	275/275
	CQ8-24	95/107	205/226	170/185	215/215	188/192	177/189	164/170	263/272
	CQ8-25	107/119	220/229	170/173	215/224	188/192	173/177	164/170	272/287
CQ9	CQ9-1	95/104	211/220	182/185	210/215	196/204	173/193	164/170	263/284
	CQ9-2	95/104	202/226	167/185	215/215	196/204	173/181	164/164	281/287
	CQ9-3	101/107	211/220	182/185	210/215	196/204	173/193	164/170	263/284
	CQ9-4	101/107	202/220	182/185	210/215	188/192	173/181	164/170	284/287
	CQ9-5	95/101	202/220	167/185	215/215	188/192	173/193	164/164	263/281
	CQ9-6	101/107	211/226	182/185	215/215	196/204	181/189	164/170	263/284
	CQ9-7	95/101	211/226	167/185	215/215	188/192	181/189	164/164	281/287
	CQ9-8	95/104	211/220	185/185	215/215	196/204	181/189	164/170	284/287
	CQ9-9	95/101	211/220	167/185	215/215	196/204	173/193	164/164	263/281
	CQ9-10	95/104	211/220	182/185	215/215	196/204	189/193	164/170	284/287
	CQ9-11	101/107	202/226	167/182	215/215	192/204	173/181	164/164	263/281
	CQ9-12	95/104	211/220	167/182	215/215	188/192	189/193	164/164	281/287
	CQ9-13	95/101	211/226	167/182	210/215	196/204	173/193	164/170	284/287
	CQ9-14	101/107	211/226	185/185	210/215	188/196	173/193	164/170	284/287
	CQ9-15	95/104	211/226	167/185	210/215	192/204	181/189	164/164	281/287
	CQ9-16	104/107	211/226	182/185	215/215	188/192	189/193	164/164	263/284
	CQ9-17	101/107	211/226	182/185	210/210	188/196	173/181	164/170	263/284
	CQ9-18	95/101	211/220	182/185	210/210	192/204	173/181	164/170	284/287
	CQ9-19	95/101	211/226	185/185	210/210	188/196	181/189	164/170	263/284
	CQ9-20	95/101	211/226	185/185	215/215	188/196	173/193	164/164	281/287
	CQ9-21	101/107	211/220	185/185	215/215	188/196	181/189	164/170	284/287
	CQ9-22	104/107	211/220	182/185	210/215	192/204	181/189	164/164	281/287
	CQ9-23	101/107	202/226	167/185	210/210	188/196	181/189	164/164	263/281
	CQ9-24	104/107	211/226	182/185	215/215	192/204	189/193	164/164	284/287
	CQ9-25	95/101	211/220	167/182	215/215	188/196	173/193	164/170	284/287
CQ10	CQ10-1	na	na	na	210/210	na	173/181	170/170	na
	CQ10-2	107/110	205/205	176/176	210/215	192/196	173/193	170/170	281/287
	CQ10-3	95/101	205/205	176/176	215/224	188/192	173/193	170/170	275/287
	CQ10-4	107/110	205/205	176/176	210/215	188/192	173/181	170/170	281/287
	CQ10-5	107/110	205/220	176/176	215/224	188/192	173/193	170/170	275/287
	CQ10-6	95/101	205/205	176/176	215/224	192/192	173/193	170/170	281/287
	CQ10-7	95/101	205/205	176/176	210/215	192/192	173/181	170/170	275/287
	CQ10-8	101/110	220/220	176/176	210/215	188/196	173/193	164/170	281/287
	CQ10-9	95/101	205/220	176/176	210/215	192/196	173/181	170/170	281/287
	CQ10-10	95/101	205/220	176/176	210/215	192/196	173/181	170/170	281/287
	CQ10-11	101/110	205/220	176/176	210/215	192/192	173/181	170/170	275/287
	CQ10-12	95/101	205/220	176/176	210/215	188/192	173/181	170/170	281/287
	CQ10-13	107/110	205/205	176/176	210/215	192/196	173/193	170/170	281/287
	CQ10-14	95/101	205/205	176/176	210/215	188/196	173/193	170/170	281/287
	CQ10-15	101/110	220/220	176/176	215/224	188/192	173/193	170/170	281/287
	CQ10-16	101/110	205/220	176/176	215/224	188/192	173/181	170/170	275/287
	CQ10-17	95/107	205/205	176/176	210/215	192/196	173/181	170/170	281/287
	CQ10-18	95/107	205/220	176/176	210/215	188/196	173/193	170/170	281/287
	CQ10-19	95/101	205/220	176/176	210/215	188/192	173/193	170/170	275/287
	CQ10-20	107/110	205/205	176/176	210/215	188/196	173/193	170/170	281/287
	CQ10-21	95/107	205/220	176/176	210/215	192/196	173/181	170/170	281/287
	CQ10-22	na	na	na	212/224	188/192	173/181	170/170	na
	CQ10-23	101/110	205/205	176/176	215/224	192/196	173/193	170/170	281/287
	CQ10-24	101/110	220/220	176/176	210/215	192/192	173/193	170/170	275/287
	CQ10-25	95/101	205/220	176/176	215/215	192/196	173/181	170/170	275/287
CQ11	CQ11-1	104/104	202/226	182/191	210/215	200/204	173/189	170/170	275/287
	CQ11-2	101/104	202/226	173/182	210/210	200/204	173/181	164/170	275/287
	CQ11-3	104/104	202/226	173/182	210/215	192/200	177/189	164/170	275/287
	CQ11-4	101/101	205/226	182/191	210/210	192/192	177/181	164/170	263/287
	CQ11-5	101/104	202/226	173/182	210/210	200/204	177/181	164/170	275/287
	CQ11-6	104/104	205/226	182/191	210/210	192/200	177/181	170/170	263/287
	CQ11-7	101/101	205/226	173/182	210/210	192/192	177/181	170/170	275/287
	CQ11-8	101/101	205/226	182/191	210/210	192/192	173/181	164/170	275/287
	CQ11-9	104/104	202/226	173/182	210/210	192/204	173/181	164/170	263/287
	CQ11-10	104/104	226/226	167/167	215/215	200/200	189/189	170/170	263/263
	CQ11-11	101/101	226/226	167/167	210/215	188/192	181/181	170/170	275/284
	CQ11-12	101/101	205/226	173/182	210/215	192/200	173/181	164/170	275/287
	CQ11-13	101/101	205/226	182/191	210/210	192/204	173/181	164/170	275/287
	CQ11-14	101/104	205/226	173/182	210/210	192/200	173/189	164/170	263/287
	CQ11-15	101/104	202/226	182/191	210/210	192/192	177/189	170/170	275/287
	CQ11-16	104/104	202/226	182/191	210/210	192/192	177/181	164/170	275/287
	CQ11-17	101/101	205/226	173/182	210/215	192/204	173/189	164/170	275/287
	CQ11-18	101/104	202/226	173/182	210/215	192/204	177/181	170/170	275/287
	CQ11-19	104/104	205/226	182/191	210/215	192/192	173/189	170/170	275/287
	CQ11-20	104/104	202/226	173/182	210/215	192/204	177/181	170/170	263/287
	CQ11-21	101/104	226/226	173/173	210/215	188/192	181/181	170/170	263/287
	CQ11-22	101/104	202/226	182/191	210/215	192/200	173/189	164/170	275/287
	CQ11-23	101/104	202/226	173/182	210/215	192/204	173/189	164/170	263/287
	CQ11-24	104/104	205/226	173/182	210/215	192/192	177/181	164/170	275/287
	CQ11-25	104/104	202/226	173/182	210/215	200/204	177/189	164/170	263/287
CQ12	CQ12-1	104/104	202/226	173/182	215/215	200/204	177/181	170/170	275/287
	CQ12-2	101/104	226/226	167/173	215/215	192/192	181/189	170/170	263/263
	CQ12-3	101/101	202/226	173/182	210/210	192/200	177/181	170/170	263/287
	CQ12-4	104/104	202/226	182/191	215/215	192/192	173/181	170/170	263/287
	CQ12-5	101/101	202/226	182/191	210/215	192/192	173/189	164/170	263/287
	CQ12-6	101/104	205/226	182/191	210/215	192/200	173/181	170/170	275/287
	CQ12-7	101/104	202/226	173/182	210/215	192/192	173/189	164/170	263/287
	CQ12-8	101/104	205/226	173/182	210/210	192/200	173/189	170/170	263/287
	CQ12-9	104/104	202/226	182/191	210/210	200/204	177/189	170/170	275/287
	CQ12-10	101/104	202/226	173/182	210/215	192/204	177/181	170/170	263/287
	CQ12-11	101/104	226/226	167/173	210/210	188/192	181/181	170/170	263/284
	CQ12-12	101/104	202/226	173/182	210/215	192/192	177/189	164/170	263/287
	CQ12-13	101/104	202/226	173/182	210/215	192/204	177/189	164/170	275/287
	CQ12-14	101/101	205/226	173/182	210/215	200/204	173/189	164/170	263/287
	CQ12-15	101/104	202/226	173/182	210/215	192/200	173/189	164/170	263/287
	CQ12-16	101/104	202/226	182/191	210/210	192/200	173/189	164/170	263/287
	CQ12-17	104/104	205/226	173/182	210/215	192/204	177/189	164/170	275/287
	CQ12-18	101/101	205/226	182/191	210/215	192/204	173/181	164/170	275/287
	CQ12-19	104/104	226/226	167/173	215/215	192/192	181/189	170/170	263/275
	CQ12-20	104/104	202/226	173/182	215/215	192/204	177/181	170/170	275/287
	CQ12-21	101/104	202/226	173/182	210/210	192/192	177/181	170/170	263/287
	CQ12-22	101/104	202/226	182/191	210/215	192/200	173/189	164/170	263/287
	CQ12-23	101/101	202/226	182/191	210/210	200/204	173/189	170/170	275/287
	CQ12-24	101/104	205/226	173/182	210/210	200/204	177/181	170/170	263/287
	CQ12-25	101/101	226/226	na	210/210	200/200	181/189	170/170	275/284
CQ13	CQ13-1	98/104	205/226	173/176	210/215	200/204	173/173	164/170	263/281
	CQ13-2	101/104	205/208	167/173	210/224	200/204	173/173	164/170	263/281
	CQ13-3	98/104	205/226	173/173	210/215	200/204	173/173	164/170	281/287
	CQ13-4	101/104	205/226	173/176	210/215	200/204	173/173	164/176	263/287
	CQ13-5	104/104	205/226	173/173	215/215	200/204	173/173	164/176	287/287
	CQ13-6	98/101	208/211	173/173	215/215	200/204	173/173	164/170	263/281
	CQ13-7	98/104	205/208	167/176	210/224	200/204	173/177	164/176	281/287
	CQ13-8	104/104	205/208	173/176	215/215	200/204	173/177	164/170	281/287
	CQ13-9	98/101	208/211	167/176	210/215	200/204	173/177	164/170	281/287
	CQ13-10	101/104	205/226	173/173	210/224	200/204	173/177	164/176	281/287
	CQ13-11	98/104	205/208	167/173	215/224	200/204	173/177	164/170	281/287
	CQ13-12	98/104	205/226	173/173	215/215	200/204	173/173	164/170	281/287
	CQ13-13	101/104	211/226	173/176	210/224	200/204	173/173	164/170	263/287
	CQ13-14	98/101	211/226	173/176	210/215	200/204	173/173	164/170	281/287
	CQ13-15	98/101	208/211	173/173	215/215	200/204	173/177	164/170	287/287
	CQ13-16	104/104	211/226	173/176	210/215	200/204	173/177	164/176	281/287
	CQ13-17	98/104	205/208	167/173	215/224	200/204	173/177	164/170	287/287
	CQ13-18	98/104	205/226	167/173	215/215	200/204	173/177	164/170	287/287
	CQ13-19	104/104	205/208	173/176	215/215	200/204	173/173	164/170	263/287
	CQ13-20	101/104	211/226	167/173	210/215	200/204	173/177	164/176	263/281
	CQ13-21	101/104	205/208	173/173	210/224	200/204	173/173	164/170	263/287
	CQ13-22	104/104	205/208	173/176	215/215	200/204	173/173	164/176	263/287
	CQ13-23	104/104	208/211	173/173	210/224	200/204	173/173	164/176	281/287
	CQ13-24	101/104	208/211	na	215/215	200/204	173/173	164/176	263/281
	CQ13-25	101/104	205/226	167/173	210/224	200/204	173/173	164/170	263/281
CQ14	CQ14-1	104/119	217/223	173/179	212/215	192/192	169/173	164/176	269/275
	CQ14-2	104/119	208/223	173/179	210/215	192/192	173/189	164/164	287/287
	CQ14-3	101/107	217/223	164/176	212/215	192/192	169/173	164/176	269/275
	CQ14-4	107/119	205/217	176/179	210/215	192/192	169/173	164/164	287/287
	CQ14-5	101/107	217/223	173/179	212/215	192/192	173/189	164/176	269/287
	CQ14-6	107/119	205/217	164/176	210/215	192/192	173/189	164/176	269/275
	CQ14-7	107/119	205/208	176/179	212/215	192/192	173/189	164/164	275/275
	CQ14-8	107/119	205/217	164/173	212/215	192/192	173/189	164/176	275/275
	CQ14-9	104/119	205/217	164/173	212/215	192/192	169/173	164/176	275/275
	CQ14-10	104/119	217/223	173/179	210/215	192/192	169/173	164/176	275/275
	CQ14-11	104/119	205/217	164/173	210/215	192/192	169/173	164/176	275/275
	CQ14-12	107/119	205/217	164/176	210/215	192/192	169/173	164/164	287/287
	CQ14-13	104/119	208/223	164/176	212/215	192/192	169/173	164/164	287/287
	CQ14-14	101/104	217/223	164/176	212/215	192/192	169/173	164/164	287/287
	CQ14-15	101/104	208/223	164/176	210/215	192/192	173/189	164/164	287/287
	CQ14-16	104/119	217/223	173/176	210/215	192/192	173/189	164/176	287/287
	CQ14-17	101/104	205/217	173/176	210/215	192/192	173/189	164/164	269/287
	CQ14-18	104/119	208/223	173/176	212/215	192/192	169/173	164/164	275/275
	CQ14-19	104/119	208/223	173/176	212/215	192/192	169/173	164/176	269/275
	CQ14-20	107/119	217/223	173/176	210/215	192/192	169/173	164/176	269/287
	CQ14-21	107/119	205/217	173/176	210/215	192/192	173/189	164/164	269/287
	CQ14-22	104/119	205/217	173/176	212/215	192/192	169/173	164/176	287/287
	CQ14-23	101/107	208/223	173/176	210/215	192/192	173/189	164/164	269/287
	CQ14-24	104/119	217/223	173/176	210/215	192/192	169/173	164/176	272/272
	CQ14-25	101/107	205/208	173/176	212/215	192/192	169/173	164/176	272/272
CQ15	CQ15-1	na	na	173/176	215/215	192/196	na	na	na
	CQ15-2	101/116	202/226	173/176	218/218	188/204	181/185	170/170	269/275
	CQ15-3	101/104	202/208	173/176	218/218	188/192	173/181	170/170	269/275
	CQ15-4	101/104	208/226	173/176	210/224	192/204	173/189	170/170	263/263
	CQ15-5	101/116	202/202	176/176	218/218	192/204	181/185	170/176	263/263
	CQ15-6	101/116	202/226	176/176	218/218	204/204	173/181	170/170	263/269
	CQ15-7	101/104	202/202	176/176	218/218	192/204	173/189	170/170	263/275
	CQ15-8	101/104	208/226	173/176	218/218	192/204	173/189	170/176	269/275
	CQ15-9	101/104	202/208	173/176	210/210	192/192	173/189	170/170	263/275
	CQ15-10	101/116	202/208	176/176	218/218	192/204	181/185	170/176	263/269
	CQ15-11	101/116	202/208	176/176	218/218	192/204	173/181	170/176	263/263
	CQ15-12	101/116	208/226	176/176	210/210	192/204	185/189	170/170	269/275
	CQ15-13	101/116	202/208	173/176	210/210	192/192	173/181	170/176	263/263
	CQ15-14	101/104	202/202	173/176	210/210	192/204	173/189	170/170	269/275
	CQ15-15	101/104	208/226	173/176	210/210	192/192	173/181	170/176	263/263
	CQ15-16	101/116	202/208	176/176	218/218	204/204	173/189	170/170	263/275
	CQ15-17	101/104	202/208	176/176	218/218	192/192	173/189	170/176	263/263
	CQ15-18	101/116	202/202	176/176	218/218	204/204	173/189	170/170	269/275
	CQ15-19	101/116	208/226	176/176	218/218	204/204	185/189	170/176	263/269
	CQ15-20	101/116	202/202	173/176	218/218	192/204	185/189	170/170	263/275
	CQ15-21	na	na	176/176	215/215	na	na	na	na
	CQ15-22	101/104	202/202	173/176	218/218	188/192	185/189	170/176	269/275
	CQ15-23	101/116	208/226	176/176	218/218	204/204	173/189	170/176	263/275
	CQ15-24	101/116	202/208	176/176	218/224	192/204	173/181	170/176	263/275
	CQ15-25	101/104	202/226	173/176	210/210	188/192	173/189	170/170	269/275
CQ16	CQ16-1	98/104	202/205	176/185	215/215	188/192	173/181	164/173	272/287
	CQ16-2	98/107	202/205	176/185	212/224	188/192	173/173	164/164	272/287
	CQ16-3	98/104	205/226	176/185	215/215	192/192	173/173	170/173	272/275
	CQ16-4	98/107	202/205	176/185	215/215	188/192	173/181	164/173	281/287
	CQ16-5	na	na	170/185	212/215	na	173/181	170/173	272/275
	CQ16-6	98/107	202/205	170/185	215/215	184/188	173/173	170/173	272/275
	CQ16-7	98/107	205/226	170/185	212/215	192/192	173/173	170/173	272/275
	CQ16-8	98/104	202/205	176/185	212/215	188/192	173/181	164/173	272/287
	CQ16-9	98/107	205/226	170/185	212/224	188/192	173/181	164/173	281/287
	CQ16-10	98/107	205/226	170/185	212/224	188/192	173/173	164/173	272/287
	CQ16-11	98/104	202/205	176/185	212/224	184/188	173/173	170/173	272/275
	CQ16-12	98/104	205/226	176/185	212/224	184/192	173/173	164/170	272/275
	CQ16-13	98/104	205/226	176/185	212/224	188/192	173/181	164/173	281/287
	CQ16-14	98/104	205/226	170/185	212/215	192/192	173/173	164/170	275/281
	CQ16-15	98/104	202/205	170/185	215/215	184/192	173/173	164/170	275/281
	CQ16-16	98/107	205/226	176/185	215/215	192/192	173/173	170/173	275/281
	CQ16-17	98/104	202/205	176/185	215/224	184/188	173/181	164/164	272/287
	CQ16-18	98/104	205/226	176/185	215/215	192/192	173/181	164/170	275/281
	CQ16-19	98/107	205/226	176/185	215/215	184/188	173/173	164/164	272/287
	CQ16-20	98/107	202/205	176/185	212/224	184/188	173/173	164/173	272/287
	CQ16-21	98/107	202/205	170/185	215/215	184/188	173/173	170/173	272/275
	CQ16-22	98/107	202/205	170/185	215/224	192/192	173/173	164/170	275/281
	CQ16-23	98/104	202/205	170/185	212/224	192/192	173/173	170/173	272/275
	CQ16-24	98/107	202/205	176/185	215/215	188/192	173/181	170/173	272/275
	CQ16-25	98/104	205/226	170/185	215/215	188/192	173/173	164/164	281/287
CQ17	CQ17-1	104/107	208/226	167/170	215/224	188/192	189/193	170/170	263/269
	CQ17-2	104/137	208/226	167/170	212/212	188/192	189/193	164/170	263/275
	CQ17-3	104/137	223/226	167/170	212/224	188/192	177/193	170/170	269/281
	CQ17-4	101/107	208/226	167/170	212/224	200/204	177/193	164/170	275/281
	CQ17-5	101/137	223/226	167/170	212/212	200/204	177/185	164/170	275/281
	CQ17-6	101/137	208/226	167/170	215/224	188/204	189/193	164/170	263/275
	CQ17-7	101/107	208/226	167/170	212/212	188/192	177/193	164/170	263/275
	CQ17-8	104/137	208/226	167/170	212/215	192/200	185/189	164/170	263/275
	CQ17-9	101/107	223/226	167/170	215/224	188/192	185/189	170/170	269/281
	CQ17-10	104/107	208/226	167/170	212/212	192/200	177/185	170/170	269/281
	CQ17-11	104/137	208/226	167/170	212/224	188/192	177/193	164/170	275/281
	CQ17-12	101/137	223/226	167/170	212/224	192/200	177/193	164/170	263/275
	CQ17-13	104/137	223/226	167/170	212/215	188/192	177/185	164/170	263/275
	CQ17-14	101/107	208/226	167/170	215/224	200/204	189/193	164/170	275/281
	CQ17-15	101/137	208/226	167/170	210/215	188/204	177/193	164/170	263/275
	CQ17-16	101/107	208/226	167/170	215/224	200/204	177/185	164/170	275/281
	CQ17-17	101/137	208/226	167/170	210/210	188/192	189/193	164/170	263/275
	CQ17-18	101/107	208/226	167/170	210/215	192/200	177/193	170/170	269/281
	CQ17-19	101/107	208/226	167/170	210/215	188/204	185/189	164/170	275/281
	CQ17-20	101/137	223/226	167/170	210/210	200/204	185/189	170/170	269/281
	CQ17-21	101/107	208/226	167/170	210/215	188/204	185/189	170/170	269/281
	CQ17-22	104/107	208/226	167/170	210/215	188/204	177/193	164/170	263/275
	CQ17-23	104/137	223/226	167/170	212/224	188/192	189/193	164/170	275/281
	CQ17-24	101/107	223/226	167/170	210/215	200/204	177/193	170/170	263/269
	CQ17-25	101/107	208/226	167/170	210/210	192/200	189/193	170/170	263/269
CQ18	CQ18-1	98/107	214/226	170/191	210/215	200/200	185/193	164/170	281/287
	CQ18-2	98/101	223/226	170/191	218/218	204/204	173/193	170/170	275/278
	CQ18-3	98/107	223/226	170/182	212/212	200/200	185/193	170/170	275/278
	CQ18-4	104/107	223/226	170/182	210/215	204/204	173/193	170/170	275/278
	CQ18-5	104/107	223/226	170/191	210/215	200/200	185/193	164/170	281/287
	CQ18-6	98/107	214/226	170/191	212/212	200/200	185/193	170/170	275/278
	CQ18-7	98/101	223/226	170/191	210/215	200/200	185/193	164/170	278/287
	CQ18-8	98/101	214/226	170/182	210/210	188/188	173/173	170/170	275/278
	CQ18-9	98/107	214/226	170/182	210/215	204/204	173/173	170/170	275/278
	CQ18-10	98/101	223/226	182/191	212/212	204/204	185/193	164/170	281/287
	CQ18-11	104/107	214/226	170/191	212/212	200/204	173/193	170/170	275/281
	CQ18-12	98/101	223/226	170/170	210/215	200/204	185/193	170/170	275/281
	CQ18-13	104/107	214/226	170/182	210/215	188/188	185/193	170/170	275/281
	CQ18-14	104/107	214/226	170/191	210/210	204/204	173/185	170/170	275/278
	CQ18-15	98/101	214/226	170/170	210/215	204/204	173/193	170/170	275/278
	CQ18-16	98/107	214/226	170/182	210/215	188/188	173/185	170/170	275/278
	CQ18-17	104/107	223/226	170/191	210/210	200/200	173/173	170/170	275/278
	CQ18-18	98/107	214/226	170/191	210/215	204/204	173/173	170/170	275/281
	CQ18-19	98/107	223/226	170/170	210/215	188/188	185/193	164/170	278/287
	CQ18-20	104/107	223/226	170/191	210/215	204/204	185/193	170/170	275/281
	CQ18-21	104/107	214/226	170/191	210/215	200/204	173/193	170/170	275/281
	CQ18-22	101/104	214/226	170/191	210/215	204/204	185/193	170/170	275/281
	CQ18-23	98/101	223/226	170/170	210/215	200/200	185/193	164/170	278/287
	CQ18-24	98/107	223/226	182/191	210/210	200/200	173/185	164/170	281/287
	CQ18-25	101/104	223/226	182/191	210/215	188/188	173/173	164/170	281/287
CQ19	CQ19-1	98/104	205/205	176/179	210/210	188/192	181/189	164/170	269/275
	CQ19-2	101/104	205/205	176/176	210/215	188/192	181/189	170/170	263/269
	CQ19-3	101/104	205/205	176/179	210/215	192/200	181/185	164/170	269/275
	CQ19-4	98/104	205/226	176/179	210/215	188/192	181/185	170/170	263/269
	CQ19-5	101/104	205/226	176/176	210/215	188/192	181/185	170/170	269/275
	CQ19-6	101/104	205/205	176/179	210/215	188/192	181/189	164/170	269/275
	CQ19-7	98/104	205/205	176/179	210/215	192/200	na	170/170	263/269
	CQ19-8	98/104	205/226	176/179	210/215	188/192	181/189	164/170	269/275
	CQ19-9	101/104	205/205	176/179	210/215	192/200	181/189	164/170	269/275
	CQ19-10	98/104	205/226	176/179	210/215	192/200	181/189	164/170	263/269
	CQ19-11	98/104	205/226	176/176	210/215	192/200	181/185	170/170	269/275
	CQ19-12	101/104	205/205	176/176	210/215	188/192	181/189	164/170	269/275
	CQ19-13	101/104	205/205	176/176	210/215	188/192	181/185	164/170	269/275
	CQ19-14	98/104	205/205	176/176	210/210	188/192	181/189	164/170	269/275
	CQ19-15	98/104	205/226	176/176	210/215	188/192	181/185	170/170	263/269
	CQ19-16	98/104	205/205	176/179	210/215	188/192	181/185	170/170	263/269
	CQ19-17	98/104	205/205	176/176	210/215	188/192	181/185	164/170	269/275
	CQ19-18	98/104	205/226	176/179	210/215	192/200	181/189	164/170	269/275
	CQ19-19	101/104	205/205	176/176	210/215	188/192	181/189	170/170	269/275
	CQ19-20	98/104	205/205	176/179	210/210	192/200	181/189	170/170	269/275
	CQ19-21	98/104	205/226	176/179	210/210	192/200	181/185	170/170	269/275
	CQ19-22	98/104	205/205	176/179	210/215	192/200	181/185	170/170	263/269
	CQ19-23	101/104	205/226	176/176	210/218	188/192	181/189	170/170	269/275
	CQ19-24	98/104	205/226	176/176	215/218	188/192	181/185	164/170	269/275
	CQ19-25	98/104	205/226	176/179	215/215	188/192	181/189	164/170	263/269
CQ20	CQ20-1	95/95	220/226	170/185	215/215	192/192	177/189	170/170	272/275
	CQ20-2	95/137	214/220	170/185	210/215	188/188	169/189	170/170	272/275
	CQ20-3	95/107	220/226	176/185	215/215	188/188	169/189	170/170	272/275
	CQ20-4	107/137	214/229	176/182	na	188/188	177/189	170/170	272/275
	CQ20-5	95/107	226/229	176/182	210/215	188/192	177/189	170/170	272/275
	CQ20-6	95/107	214/220	176/185	215/215	192/192	177/189	170/170	272/275
	CQ20-7	95/107	214/220	170/182	215/215	188/192	177/189	170/170	272/275
	CQ20-8	95/137	220/226	176/185	210/215	188/188	177/189	170/170	272/275
	CQ20-9	95/95	214/229	170/185	210/210	192/192	177/189	170/170	272/275
	CQ20-10	95/137	214/220	170/185	210/215	192/192	169/189	170/170	272/275
	CQ20-11	95/95	226/229	170/182	na	188/192	169/189	170/170	272/275
	CQ20-12	107/137	214/229	170/185	210/215	192/192	177/189	170/170	272/275
	CQ20-13	95/137	214/229	176/182	210/210	192/192	169/189	170/170	272/275
	CQ20-14	95/95	220/226	176/185	210/215	188/192	177/189	170/170	272/275
	CQ20-15	95/137	214/229	170/182	210/215	192/192	177/189	170/170	272/275
	CQ20-16	95/137	226/229	176/182	210/215	188/188	177/189	170/170	272/275
	CQ20-17	95/107	214/229	176/185	210/215	188/188	169/189	170/170	272/275
	CQ20-18	95/107	226/229	176/182	210/215	188/188	169/189	170/170	272/275
	CQ20-19	95/107	214/220	176/185	210/215	188/188	na	170/170	272/275
	CQ20-20	95/107	214/229	176/185	210/215	188/192	177/189	170/170	272/275
	CQ20-21	95/137	220/226	176/185	210/215	188/192	177/189	170/170	272/275
	CQ20-22	95/107	214/229	170/185	210/215	188/188	177/189	170/170	272/275
	CQ20-23	107/137	226/229	176/182	210/215	188/188	169/189	170/170	272/275
	CQ20-24	95/107	226/229	176/185	210/215	188/188	177/189	170/170	272/275
	CQ20-25	95/107	226/229	170/182	210/215	188/188	169/189	170/170	272/275
CQ21	CQ21-1	101/107	214/226	173/176	215/215	188/192	169/197	164/170	263/263
	CQ21-2	101/107	214/226	173/182	215/215	200/200	169/197	164/164	263/263
	CQ21-3	98/101	202/220	173/176	210/215	188/192	169/173	164/170	263/263
	CQ21-4	98/119	220/226	170/182	215/215	188/188	173/173	164/170	263/263
	CQ21-5	101/107	202/220	173/176	210/215	200/200	169/197	164/164	263/263
	CQ21-6	98/101	214/226	173/176	215/215	200/200	173/197	164/164	263/263
	CQ21-7	98/101	214/226	170/182	215/215	192/200	173/197	164/170	263/263
	CQ21-8	98/119	214/226	173/176	215/215	200/200	173/197	164/164	263/263
	CQ21-9	101/107	214/226	173/176	210/215	188/188	169/173	164/170	263/263
	CQ21-10	101/107	220/226	170/176	215/215	188/192	169/173	164/164	263/263
	CQ21-11	107/119	220/226	170/182	215/215	200/200	173/173	164/164	263/263
	CQ21-12	98/101	214/226	170/176	215/215	200/200	169/197	164/164	263/263
	CQ21-13	101/107	220/226	170/182	215/215	192/200	173/197	164/170	263/263
	CQ21-14	98/119	214/226	173/176	215/215	200/200	173/173	164/170	263/263
	CQ21-15	107/119	220/226	173/182	210/215	188/188	173/197	164/164	263/263
	CQ21-16	98/101	214/226	170/182	215/215	188/192	173/173	164/170	263/263
	CQ21-17	101/107	202/220	173/182	215/215	188/192	173/197	164/170	263/263
	CQ21-18	101/107	214/226	173/176	215/215	200/200	173/197	164/164	263/263
	CQ21-19	98/119	220/226	170/182	210/215	188/188	173/173	164/170	263/263
	CQ21-20	98/101	202/214	173/176	210/215	188/192	169/197	164/170	263/263
	CQ21-21	98/119	202/220	173/176	210/215	200/200	169/197	164/164	263/263
	CQ21-22	107/119	202/214	170/182	215/215	200/200	173/197	164/164	263/263
	CQ21-23	98/101	220/226	173/176	215/215	188/192	173/173	164/170	263/263
	CQ21-24	101/107	214/226	173/182	215/215	200/200	173/197	164/164	263/263
	CQ21-25	98/119	202/214	173/182	215/215	188/192	173/173	164/170	263/263
CQ22	CQ22-1	104/119	226/229	170/185	224/224	200/204	173/185	164/170	263/281
	CQ22-2	119/137	205/229	170/185	215/215	200/204	181/185	164/170	281/287
	CQ22-3	104/119	205/229	167/185	215/215	192/200	181/185	164/170	281/287
	CQ22-4	101/104	202/205	167/185	215/215	200/204	181/185	164/170	263/263
	CQ22-5	101/137	226/229	170/185	224/224	192/200	173/185	164/170	263/263
	CQ22-6	119/137	205/229	167/185	215/215	192/200	173/185	164/170	281/287
	CQ22-7	101/137	202/205	170/185	215/215	192/200	181/193	164/170	263/281
	CQ22-8	101/104	226/229	170/185	215/215	200/204	181/185	164/170	263/263
	CQ22-9	101/104	226/229	170/185	224/224	192/200	173/193	164/170	263/287
	CQ22-10	101/137	202/205	167/185	215/215	200/204	181/193	164/170	263/287
	CQ22-11	101/104	205/229	167/185	215/224	200/204	173/193	164/170	281/287
	CQ22-12	101/104	205/229	167/185	215/215	200/204	181/185	164/170	263/287
	CQ22-13	104/119	226/229	170/185	215/215	200/204	181/185	164/170	263/263
	CQ22-14	101/104	202/205	167/185	215/215	200/204	173/185	164/170	263/281
	CQ22-15	119/137	226/229	170/185	215/215	192/200	181/185	164/170	263/281
	CQ22-16	101/137	202/226	167/185	215/215	192/200	181/185	164/170	263/281
	CQ22-17	119/137	202/205	170/185	215/224	192/200	181/185	164/170	263/263
	CQ22-18	101/104	202/226	167/185	215/215	200/204	181/185	164/170	263/287
	CQ22-19	101/137	202/226	170/185	215/224	200/204	181/185	164/170	263/287
	CQ22-20	104/119	205/229	170/185	224/224	192/200	181/193	164/170	263/263
	CQ22-21	101/104	226/229	167/185	224/224	200/204	173/193	164/170	281/287
	CQ22-22	101/104	226/229	170/185	215/215	192/200	181/193	164/170	281/287
	CQ22-23	101/137	202/226	170/185	215/215	192/200	173/193	164/170	263/281
	CQ22-24	119/137	202/226	170/185	224/224	192/200	173/185	164/170	281/287
	CQ22-25	119/137	205/229	167/185	215/215	192/200	173/185	164/170	263/281
CQ23	CQ23-1	95/143	211/226	176/182	210/215	188/188	173/193	164/170	263/263
	CQ23-2	143/143	208/226	176/182	215/215	188/188	177/193	164/170	266/281
	CQ23-3	95/104	226/226	176/182	210/224	188/188	173/177	164/170	263/263
	CQ23-4	95/104	208/211	176/182	215/215	188/188	173/193	164/170	263/263
	CQ23-5	95/143	226/226	176/176	215/215	204/204	173/173	164/170	266/281
	CQ23-6	95/104	226/226	176/176	215/224	204/204	173/173	164/170	266/281
	CQ23-7	95/104	208/226	176/182	215/215	204/204	173/177	164/170	263/263
	CQ23-8	104/143	208/211	176/182	215/215	204/204	181/193	164/170	263/263
	CQ23-9	143/143	208/226	176/176	215/215	188/188	173/177	164/170	266/281
	CQ23-10	95/143	208/226	176/176	224/224	188/188	173/181	164/170	266/281
	CQ23-11	95/143	211/226	176/176	224/224	204/204	173/193	164/170	266/281
	CQ23-12	143/143	208/211	176/176	215/224	204/204	173/173	164/170	263/263
	CQ23-13	104/143	226/226	176/176	215/215	204/204	173/173	164/170	263/263
	CQ23-14	95/104	208/211	176/176	215/215	204/204	173/173	164/170	266/281
	CQ23-15	95/104	211/226	176/176	224/224	204/204	173/193	164/170	263/281
	CQ23-16	104/143	211/226	176/182	215/224	188/188	173/193	164/170	266/266
	CQ23-17	95/104	208/211	176/182	210/215	188/188	173/193	164/170	263/263
	CQ23-18	143/143	226/226	176/176	210/224	204/204	173/177	164/170	266/281
	CQ23-19	95/143	211/226	176/176	215/224	204/204	173/193	164/170	263/263
	CQ23-20	143/143	211/226	176/182	210/224	188/188	173/173	164/170	266/281
	CQ23-21	143/143	211/226	176/182	215/215	204/204	173/177	164/170	266/266
	CQ23-22	143/143	211/226	176/182	210/215	204/204	173/173	164/170	263/281
	CQ23-23	95/143	211/226	176/182	224/224	188/188	173/173	164/170	266/266
	CQ23-24	95/143	208/211	176/176	224/224	204/204	173/173	164/170	266/281
	CQ23-25	104/143	208/211	176/176	210/224	188/188	173/177	164/170	263/281
CQ24	CQ24-1	104/137	202/223	182/188	215/221	192/200	173/181	164/176	263/266
	CQ24-2	107/143	223/226	176/182	215/221	200/204	173/181	164/176	263/266
	CQ24-3	137/143	226/238	176/182	215/221	192/192	173/185	164/170	263/281
	CQ24-4	101/137	208/226	167/182	210/210	192/204	173/181	164/170	263/263
	CQ24-5	137/143	226/238	176/182	215/221	192/192	173/181	164/176	263/266
	CQ24-6	104/107	202/238	176/182	215/221	192/200	173/181	164/176	263/281
	CQ24-7	107/143	202/238	182/188	215/215	192/192	185/185	164/176	263/266
	CQ24-8	104/137	223/226	182/188	215/215	192/200	185/185	164/170	263/281
	CQ24-9	101/137	205/226	167/182	210/224	188/204	185/185	164/164	263/263
	CQ24-10	101/137	205/226	161/182	210/224	188/188	173/181	164/170	263/272
	CQ24-11	104/137	202/238	176/182	215/221	192/200	173/185	170/176	263/281
	CQ24-12	104/137	223/226	176/182	215/215	192/192	181/185	170/176	263/281
	CQ24-13	107/137	208/226	167/182	210/224	204/204	173/181	164/170	263/272
	CQ24-14	104/107	205/226	161/182	210/224	188/188	173/181	164/170	263/272
	CQ24-15	107/137	208/226	167/182	210/224	188/192	181/185	164/170	263/272
	CQ24-16	107/137	208/226	167/182	210/210	188/192	181/185	164/164	263/272
	CQ24-17	137/143	223/226	176/182	215/215	192/192	181/185	164/170	263/281
	CQ24-18	137/143	223/226	182/188	215/215	192/200	181/185	164/176	263/266
	CQ24-19	107/137	208/226	167/182	224/224	188/204	173/181	170/170	263/263
	CQ24-20	104/107	202/223	176/182	215/215	188/204	173/173	164/170	263/281
	CQ24-21	107/143	202/223	182/188	215/215	200/204	181/185	164/176	263/266
	CQ24-22	107/143	202/238	182/188	215/215	192/200	173/181	164/170	263/281
	CQ24-23	137/143	202/238	182/188	215/215	192/200	181/185	164/164	263/281
	CQ24-24	101/104	205/226	167/182	224/224	188/192	173/181	164/170	263/263
	CQ24-25	101/104	205/226	161/182	210/224	188/192	181/185	164/170	263/272
CQ25	CQ25-1	107/143	202/223	176/182	215/215	192/200	173/181	170/176	263/281
	CQ25-2	107/143	226/238	176/182	215/215	200/204	173/173	170/176	263/266
	CQ25-3	104/137	202/223	182/188	215/215	192/192	181/185	164/170	263/281
	CQ25-4	107/143	226/238	182/188	215/215	200/204	173/185	170/176	263/281
	CQ25-5	104/137	202/223	182/188	215/215	200/204	173/185	164/170	263/281
	CQ25-6	104/137	202/223	176/182	215/215	192/200	173/185	164/176	263/266
	CQ25-7	104/107	226/238	182/188	215/215	200/204	173/185	164/170	263/281
	CQ25-8	104/137	226/238	176/182	215/215	192/192	181/185	170/176	263/281
	CQ25-9	104/137	223/226	176/182	215/215	192/204	181/185	164/176	263/266
	CQ25-10	104/107	208/226	161/182	210/224	188/192	181/185	170/170	263/272
	CQ25-11	107/137	208/226	161/182	224/224	188/204	173/181	164/170	263/272
	CQ25-12	104/137	202/238	176/182	215/221	192/200	173/173	170/176	263/266
	CQ25-13	104/137	202/238	176/182	215/221	200/204	173/185	164/164	263/266
	CQ25-14	104/107	205/226	167/182	215/215	192/204	181/181	164/170	263/266
	CQ25-15	104/107	202/226	182/188	215/215	192/192	181/185	164/170	263/281
	CQ25-16	137/143	226/238	182/188	215/221	200/204	173/185	170/176	263/281
	CQ25-17	104/137	202/223	182/188	215/215	192/192	173/173	164/164	263/266
	CQ25-18	137/143	223/226	182/188	215/221	200/204	173/181	164/170	263/266
	CQ25-19	104/107	223/226	182/188	215/221	192/204	173/181	170/176	263/266
	CQ25-20	104/137	223/226	182/188	215/221	192/204	173/185	164/170	263/281
	CQ25-21	104/107	205/226	182/188	210/215	192/192	181/181	164/170	263/266
	CQ25-22	101/104	208/226	167/182	210/224	192/204	181/185	164/170	263/272
	CQ25-23	101/137	205/226	161/182	210/210	192/204	173/181	170/170	263/272
	CQ25-24	137/143	202/223	182/188	215/215	192/200	181/185	164/176	263/281
	CQ25-25	107/143	226/238	176/182	215/215	204/204	181/185	164/176	263/266
